# Supplementary material
Source: Copernicus journal article supplement (doi:10.5194/essd-18-2951-2026)
Supplement: Supplementary file 1 [file essd-18-2951-2026-supplement.pdf]

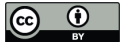

*Supplement of*

**A historical nutrient dataset (1895–2024) for the North Pacific:  
reconstructed from machine learning and hydrographic observations**

**Chuanjun Du et al.**

*Correspondence to:* Chuanjun Du (cjdu@hainanu.edu.cn) and Xiaolin Li (xlli@xmu.edu.cn)

The copyright of individual parts of the supplement might differ from the article licence.

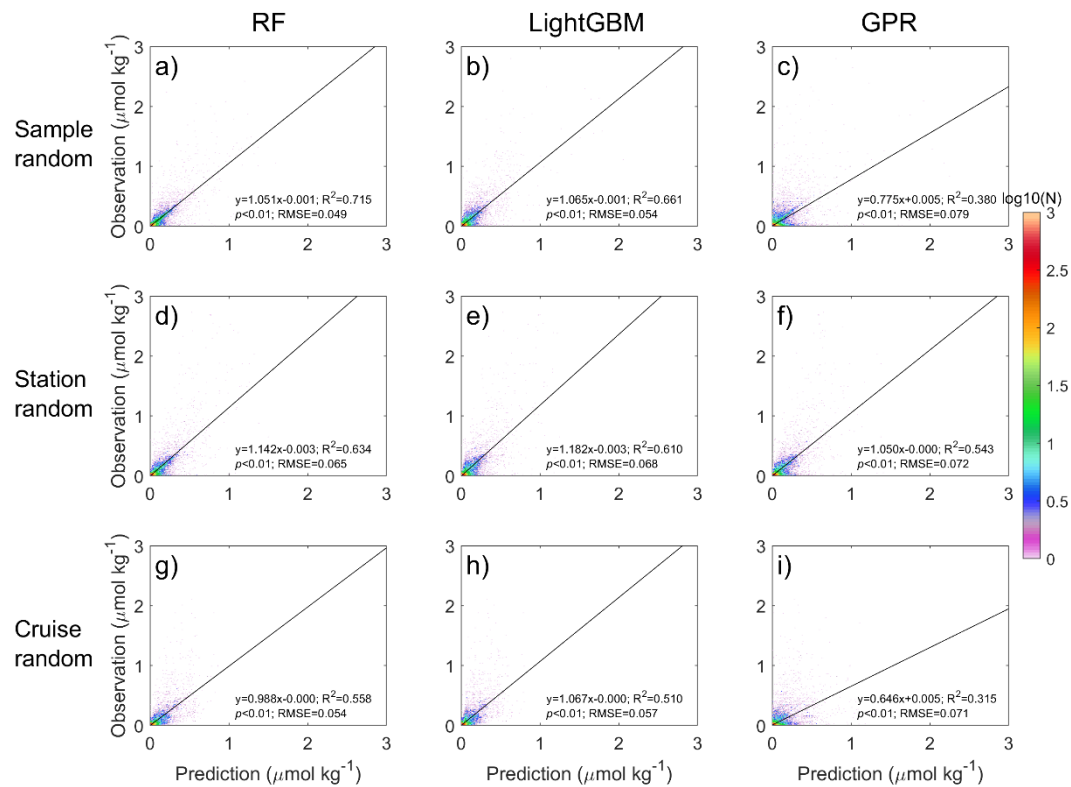

7

8 **Figure S1.** Validating the reconstructed  $\text{NO}_2^-$  concentrations using leave-one-out cross-  
 9 validation with different data selection strategies and machine learning methods. Plots  
 10 shown in row 1 correspond to the sample random strategy (a-c), row 2 correspond to  
 11 the station random strategy (d-e), and row 3 correspond to the cruise random  
 12 strategy (g-i). Plots shown in column 1 correspond to the Random Forest (RF; a, d, and  
 13 g), column 2 correspond to the LightGBM (b, e, and h), and column 3 correspond to  
 14 the Gaussian Process Regression (GPR; c, f, and i). The black lines and text show the  
 15 fitted linear regressions, regression equations, coefficient of determination ( $R^2$ ),  $p$   
 16 values, and Root Mean Squared Errors (RMSE). The color represents the data density  
 17 ( $N$ , number of observations). Note that the logarithmic scale of  $N$  is applied.

18

19

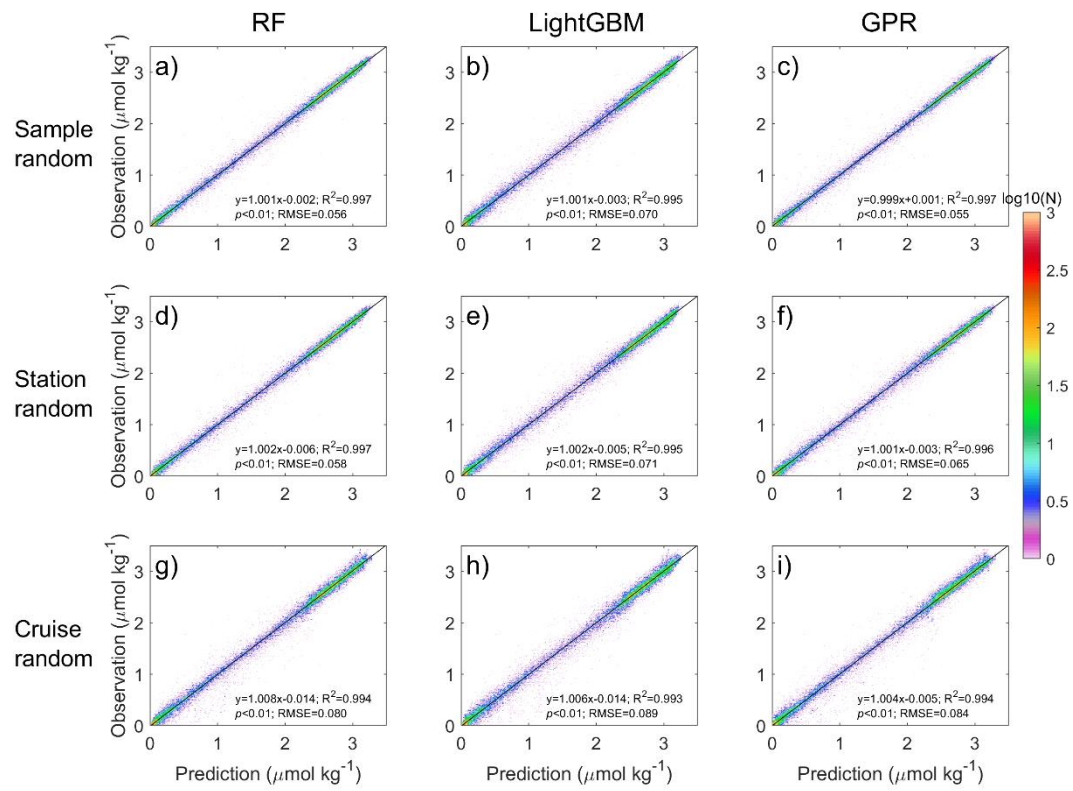

20

21 **Figure S2.** Similar to Fig. S1, but for DIP.

22

23

24

25

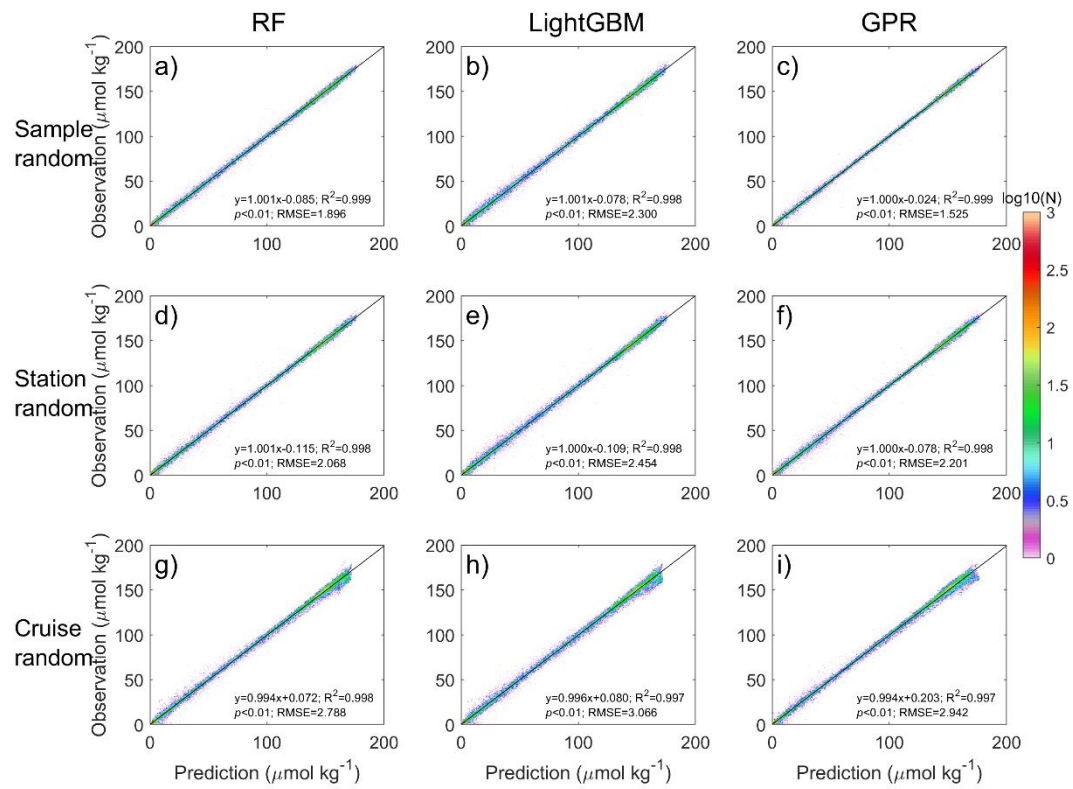

26

27 **Figure S3.** Similar to Fig. S1, but for  $\text{Si(OH)}_4$ .

28

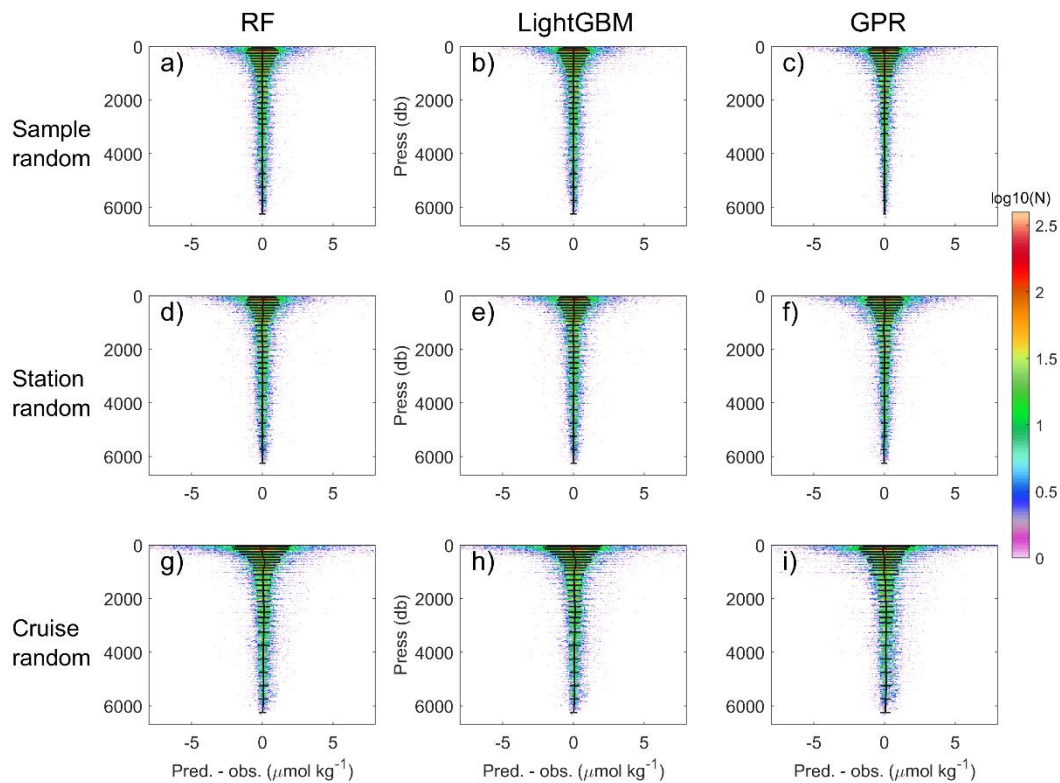

29

30 **Figure S4.** Vertical profiles of  $\text{NO}_x^-$  ( $\text{NO}_3^- + \text{NO}_2^-$ ) reconstruction errors with different  
 31 data selection strategies and machine learning methods. Colors indicate data density;  
 32 the solid black vertical line represents the mean absolute error ( $\mu\text{mol kg}^{-1}$ ); and the  
 33 horizontal error bars denote the  $\pm 1$  standard deviation range. Plots in row 1 correspond  
 34 to the sample random strategy (a-c); plots in row 2 correspond to the station random  
 35 strategy (d-f); and plots in row 3 correspond to the cruise random strategy (g-i). Plots  
 36 in column 1 correspond to the Random Forest (RF; a, d, g); plots in column 2  
 37 correspond to LightGBM (b, e, h); and plots in column 3 correspond to Gaussian  
 38 Process Regression (GPR; c, f, i).

39

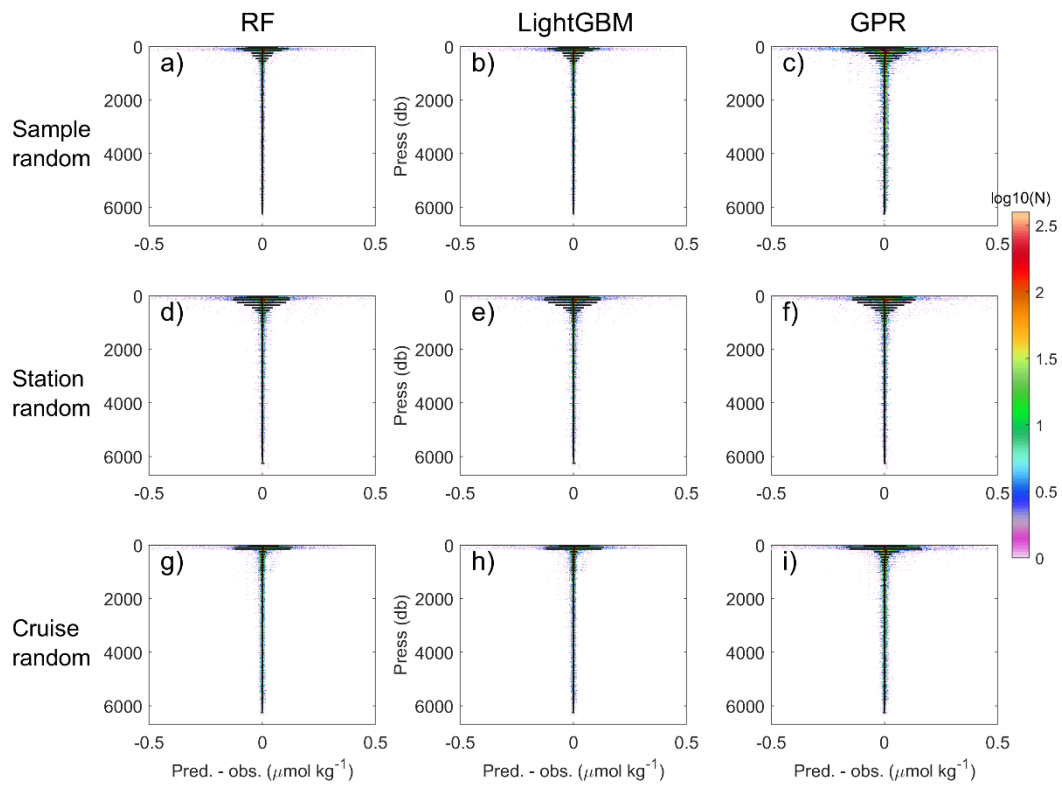

40

41 **Figure S5.** Same as Fig. S4, but for  $\text{NO}_2^-$ .

42

43

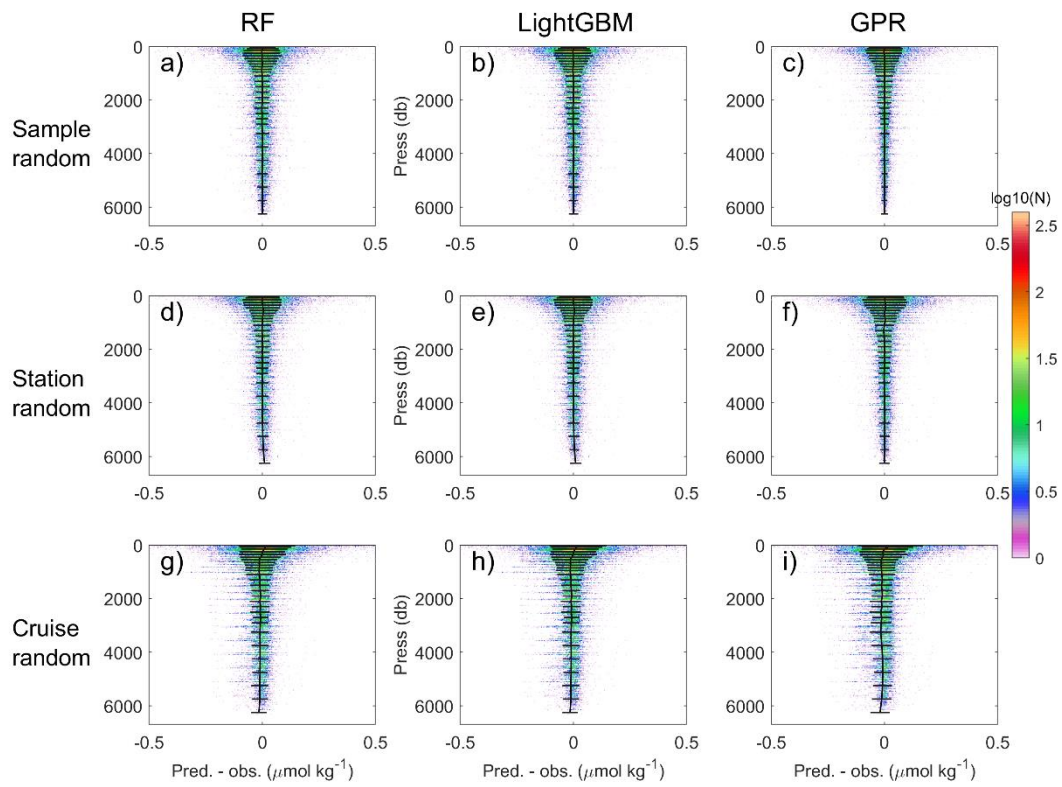

44

45 **Figure S6.** Same as Fig. S4, but for DIP.

46

47

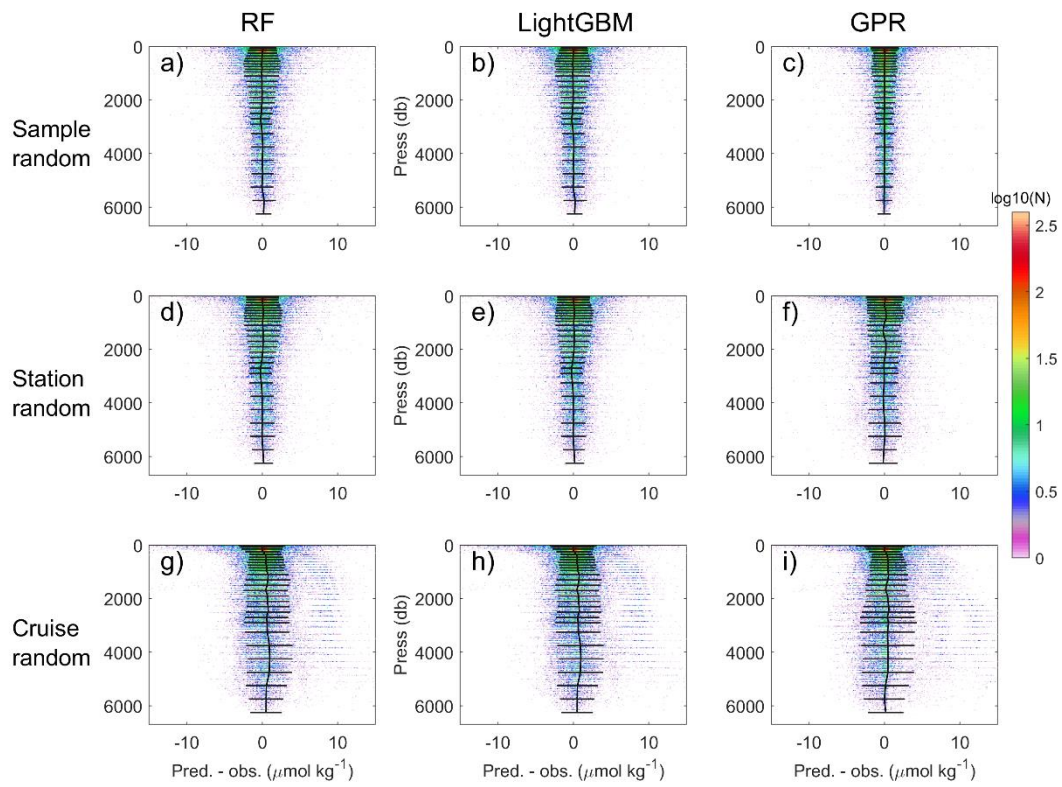

48

49 **Figure S7.** Same as Fig. S4, but for  $\text{Si(OH)}_4$ .

50

51

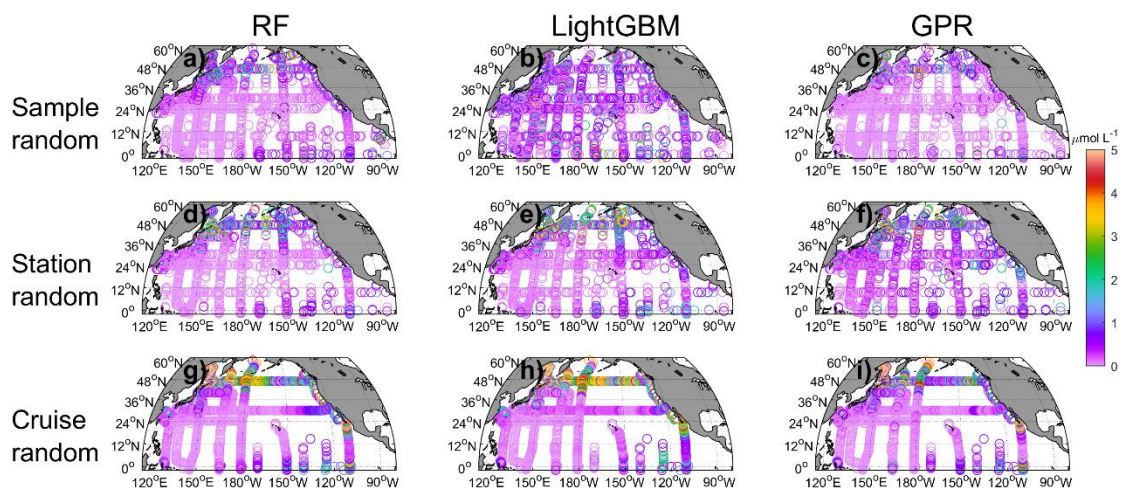

52

53 **Figure S8.** Spatial distribution of absolute errors (absolute value of predicted subtract  
 54 observed values) for surface  $\text{NO}_x^-$  concentrations with different data selection strategies  
 55 and machine learning methods. Plots shown in row 1 correspond to the sample random  
 56 strategy (a-c), row 2 correspond to the station random strategy (d-e), and row 3  
 57 correspond to the cruise random strategy (g-i). Plots shown in column 1 correspond to  
 58 the Random Forest (RF; a, d, and g), column 2 correspond to the LightGBM (b, e, and  
 59 h), and column 3 correspond to the Gaussian Process Regression (GPR; c, f, and i).

60

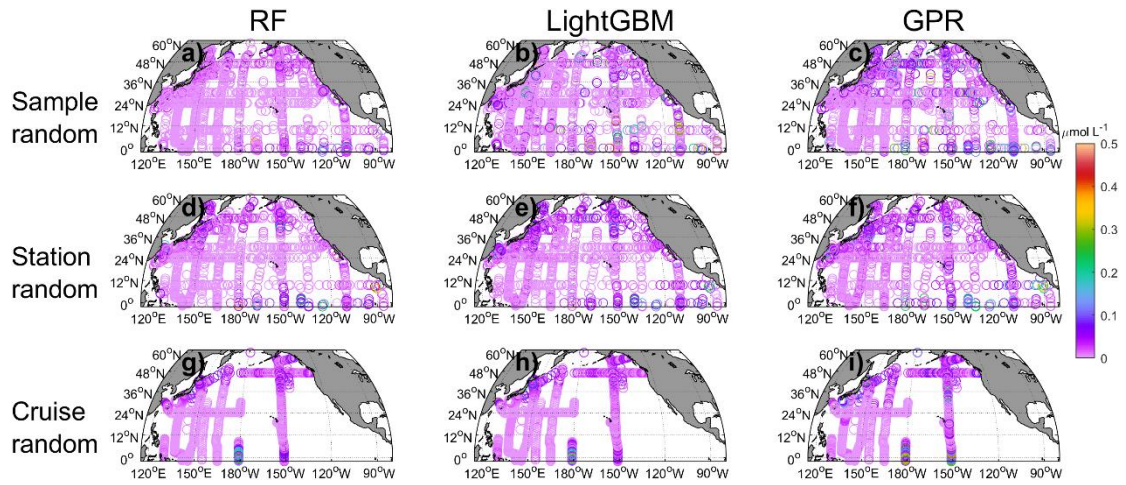

61

62 **Figure S9.** Same as Fig. S8, but for  $\text{NO}_2^-$ .

63

64

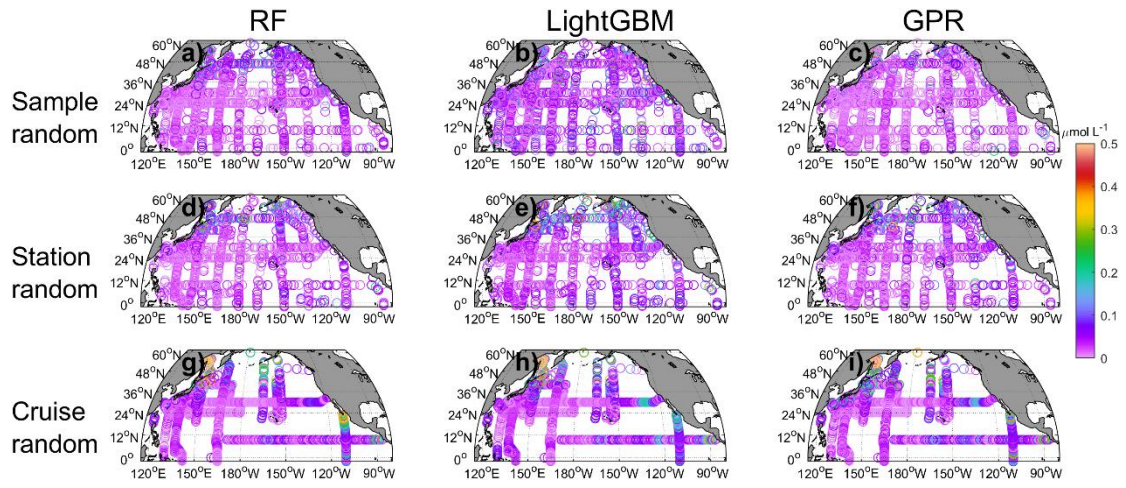

65

66 **Figure S10.** Same as Fig. S8, but for DIP.

67

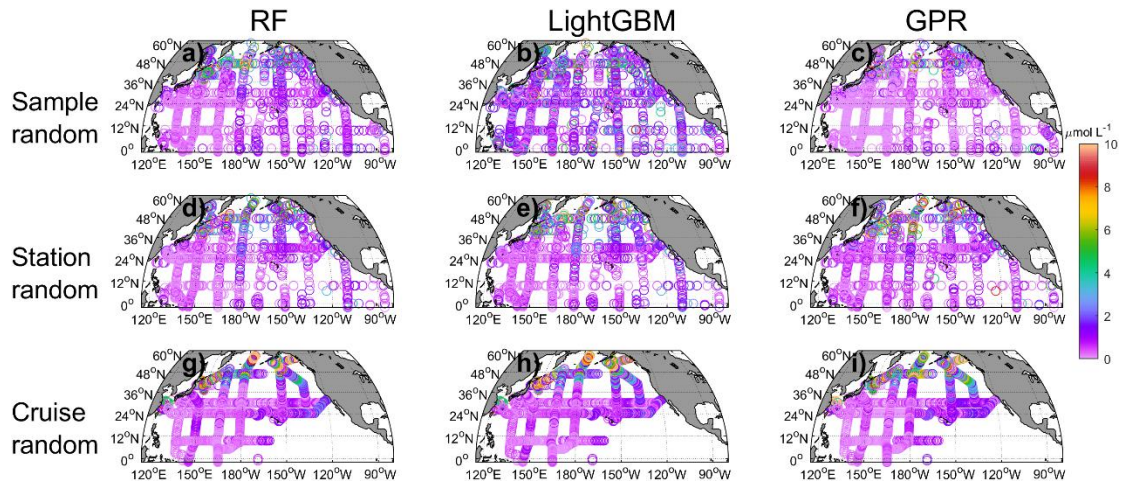

68

69 **Figure S11.** Same as Fig. S8, but for  $\text{Si(OH)}_4$ .

70

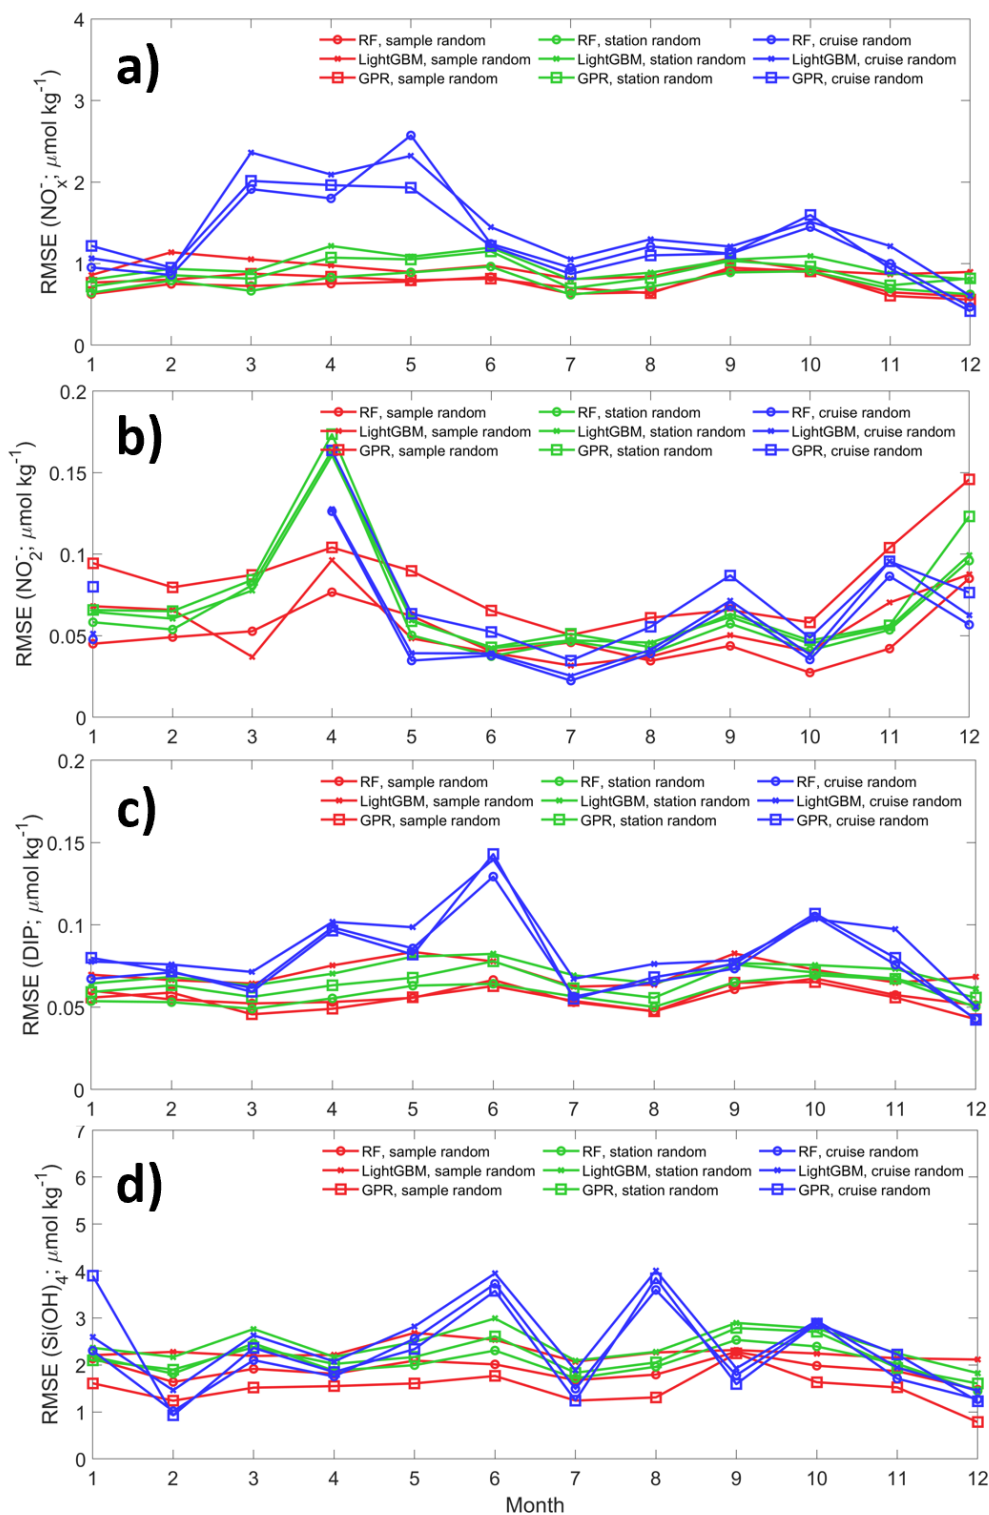

71

72 **Figure S12.** Monthly variations in reconstruction errors (root mean square error) for  
 73 different parameters under various data selection strategies and machine learning  
 74 methods.

75

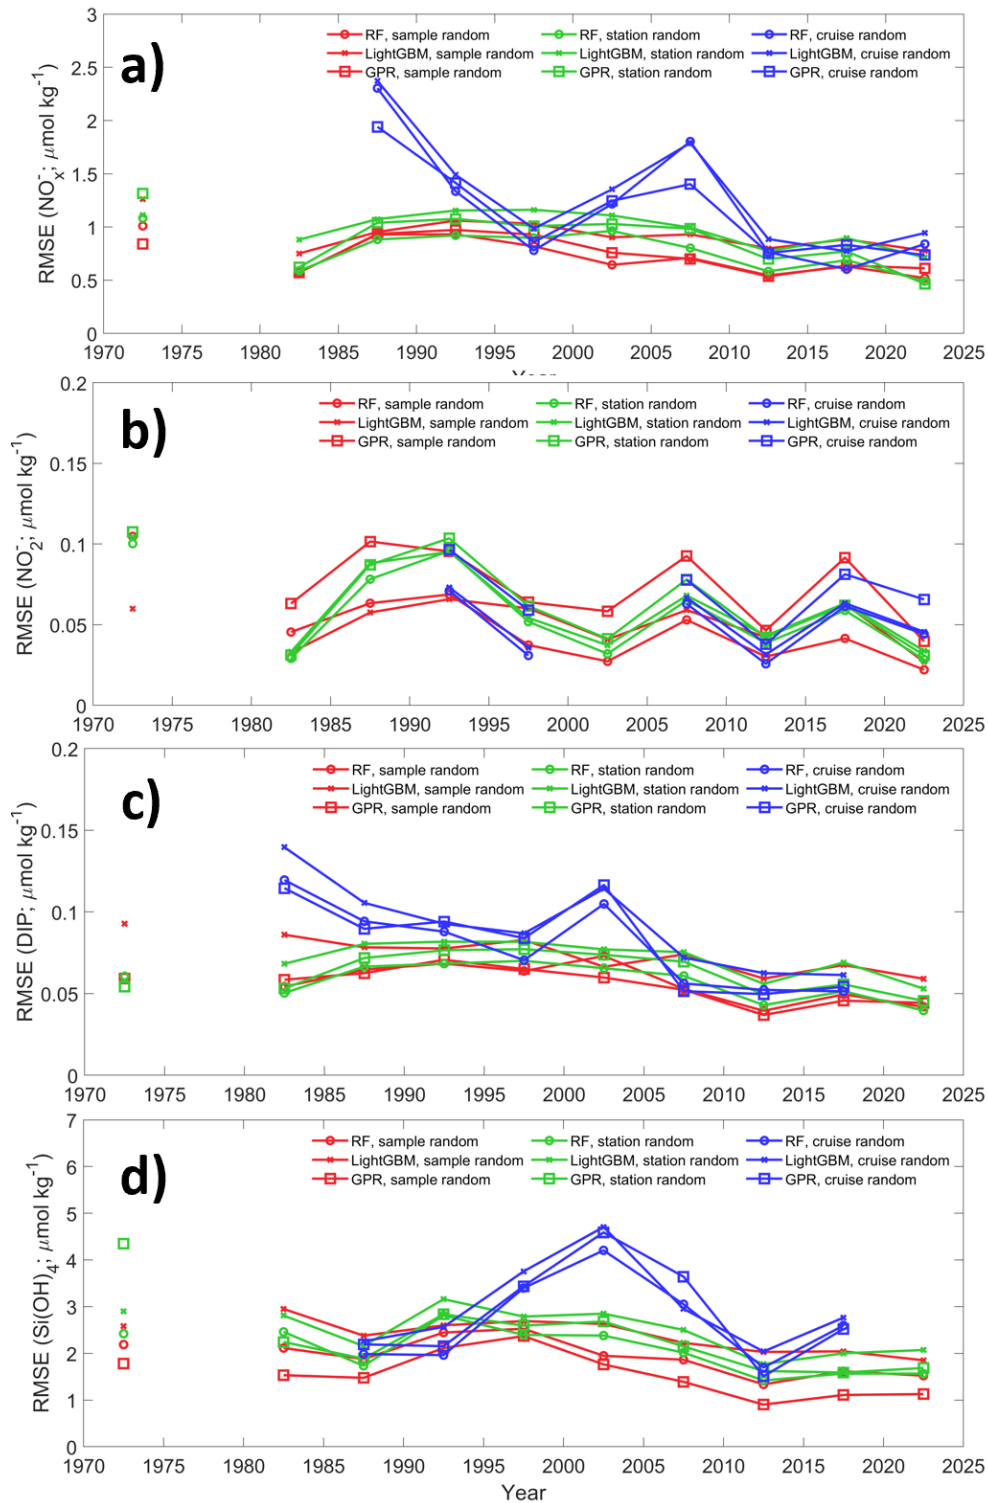

76

77 **Figure S13.** Long-term variations in reconstruction error (root mean square error)  
 78 under different data selection strategies and machine learning methods.

79

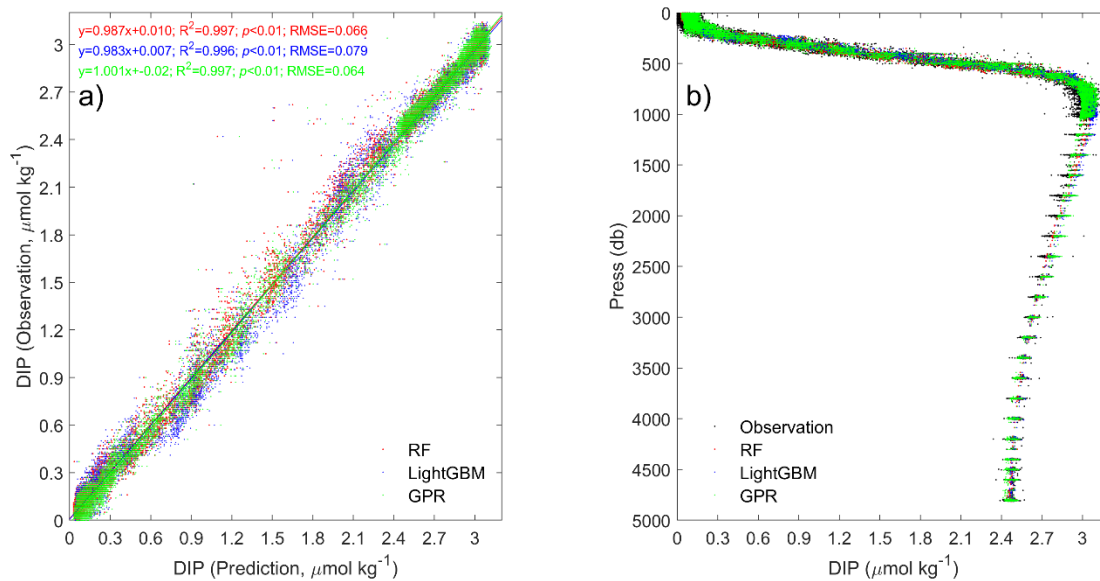

80  
 81 **Figure S14.** Validating the reconstructed DIP concentrations at Station ALOHA. a)  
 82 Reconstructed DIP vs. observations: Random Forest (RF; red dots), LightGBM (blue  
 83 dots), and Gaussian Process Regression (GPR; green dots); b) Profiles of observed  
 84 (black dots) and reconstructed DIP from RF (red dots), LightGBM (blue dots), and GPR  
 85 (green dots).

86  
 87  
 88

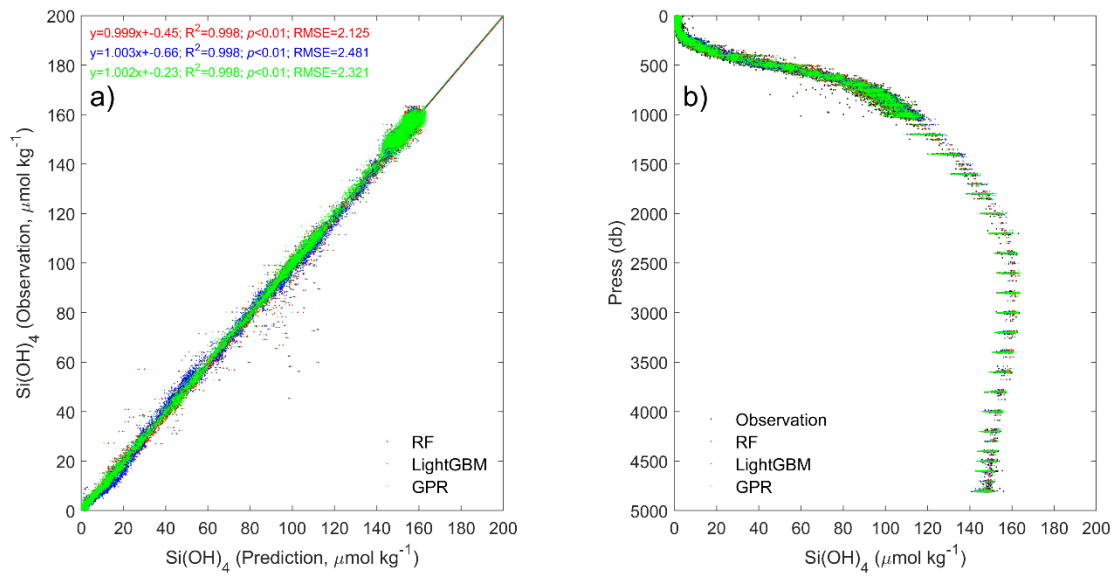

89

90 **Figure S15.** Similar to Fig. S14, but for  $\text{Si(OH)}_4$ .

91

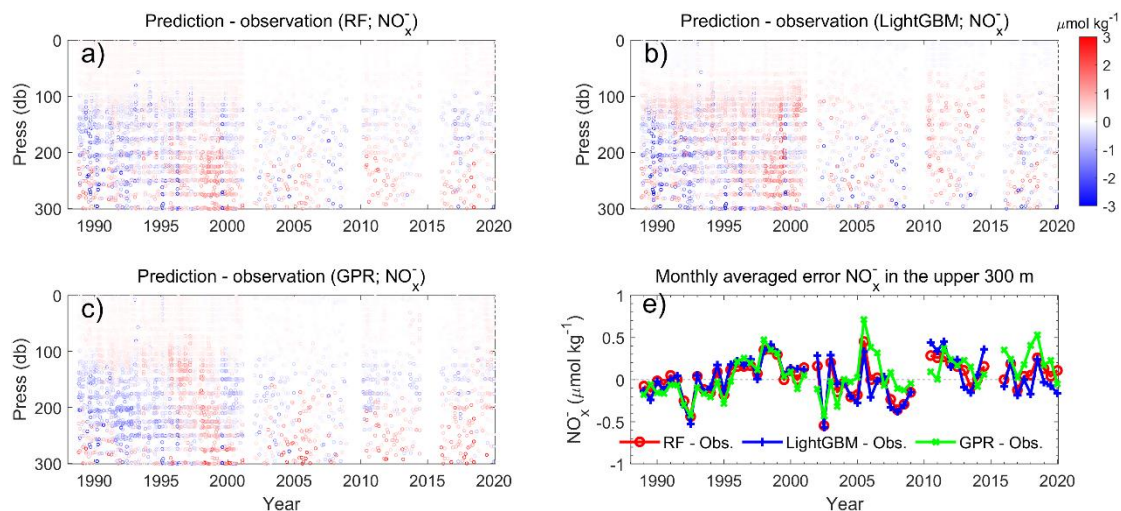

92

93 **Figure S16.** Temporal variations of reconstruction error profiles of  $\text{NO}_x^-$  ( $\text{NO}_3^- + \text{NO}_2^-$ )  
 94 (prediction minus observations) in the upper 300 m at Station ALOHA from 1988 to  
 95 2021 with different machine learning models: Random Forest (RF; a), LightGBM (b),  
 96 and Gaussian Process Regression (GPR; c). Note that the colorbar plotted in (b) is also  
 97 applicable to (a) and (c). (e) Temporal variations of monthly averaged  $\text{NO}_x^-$  prediction  
 98 errors (prediction minus observations) in the upper 300 m from RF, LightGBM, and  
 99 GPR.

100

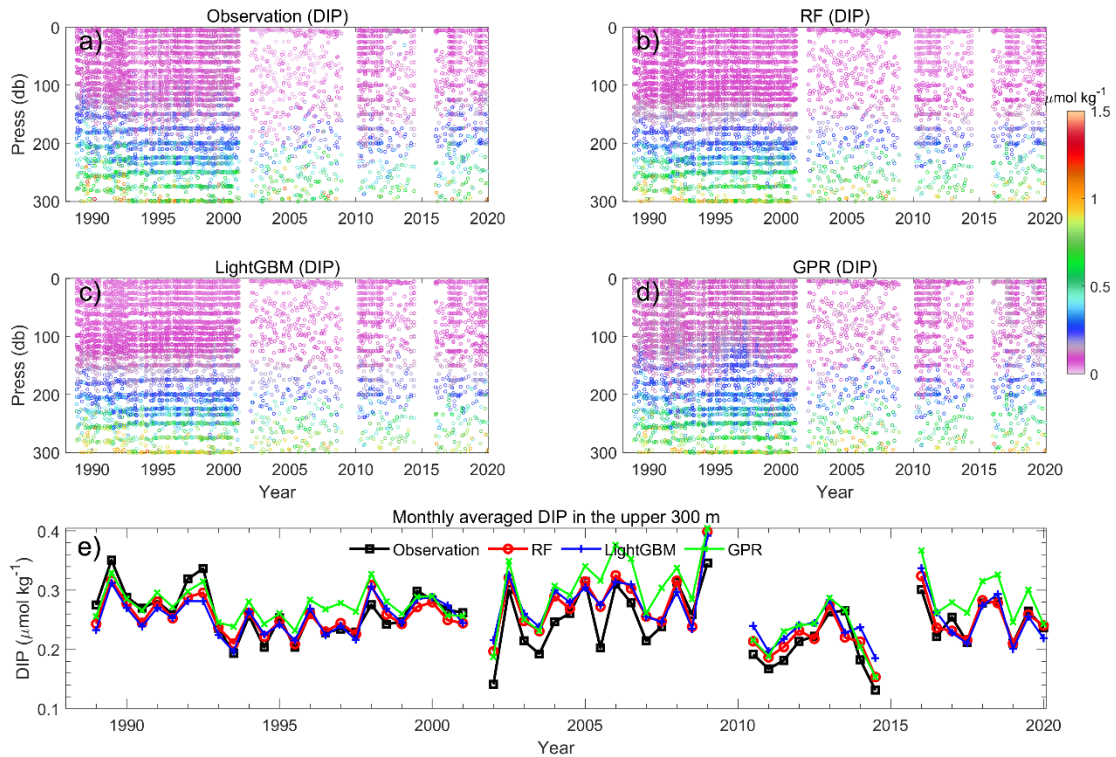

101

102 **Figure S17.** Temporal variations of DIP concentrations in the upper 300 m at Station  
 103 ALOHA from 1988 to 2021 for observed (a) and reconstructed DIP by Random Forest  
 104 (RF; b), LightGBM (c), and Gaussian Process Regression (GPR; d). (e) Time series of  
 105 monthly averaged  $\text{NO}_x^-$  concentrations in the upper 300 m from observations, and  
 106 reconstructions by RF, LightGBM, and GPR, respectively.

107

108

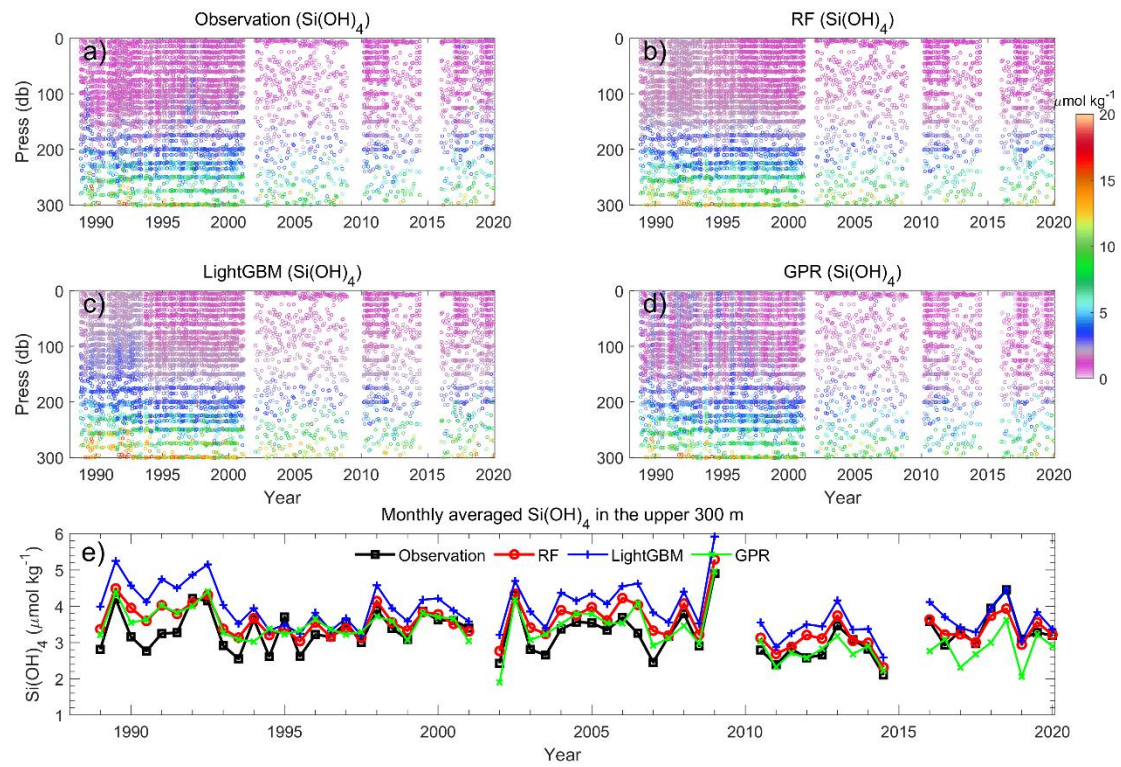

109

110 **Figure S18.** Similar to Fig. S17, but for  $\text{Si(OH)}_4$ .

111

112

113

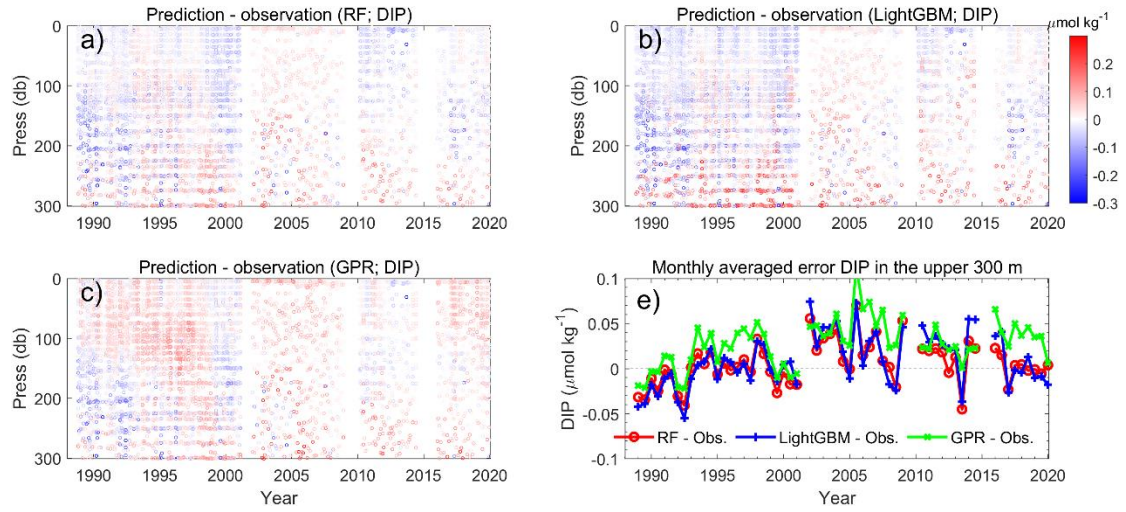

114

115 **Figure S19.** Same as Fig. S16, but for DIP.

116

117

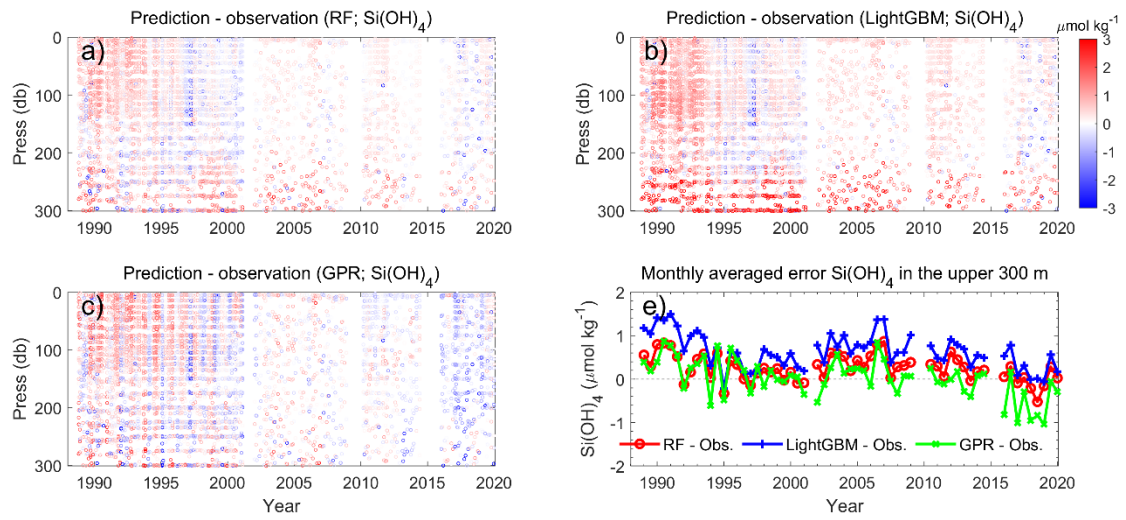

118

119 **Figure S20.** Similar to Fig. S16, but for  $\text{Si(OH)}_4$ .

120

121

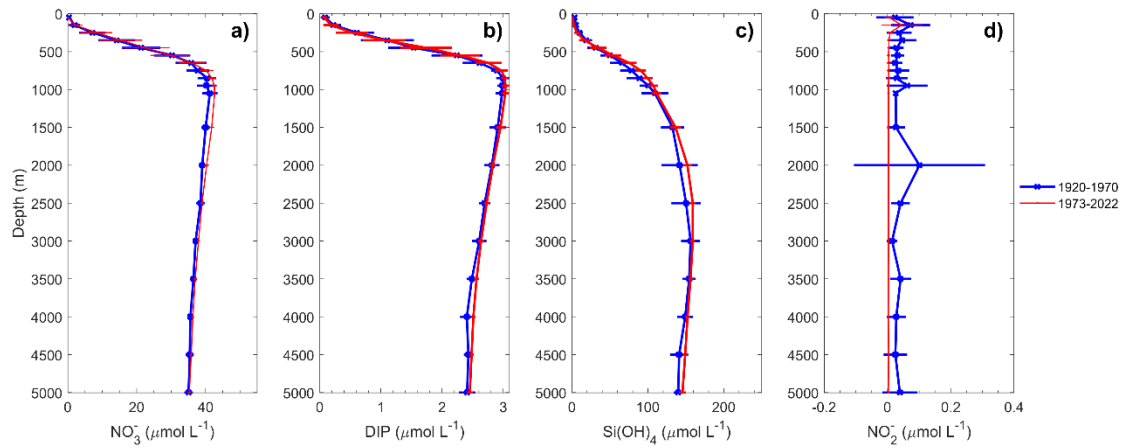

122

123 **Figure S21.** Mean profiles (vertical lines) with standard deviations (horizontal lines) of

124 nutrients between 1920–1970 (Ocean Station Data in the World Ocean Database after

125 quality control) and 1973–2022 (CCHDO data) in the North Pacific basin region

126 ( $180^\circ\text{E}$ – $150^\circ\text{W}$ ,  $15^\circ\text{N}$ – $30^\circ\text{N}$ ): (a)  $\text{NO}_3^-$ ; (b) DIP; (c)  $\text{Si(OH)}_4$ ; (d)  $\text{NO}_2^-$ .

127

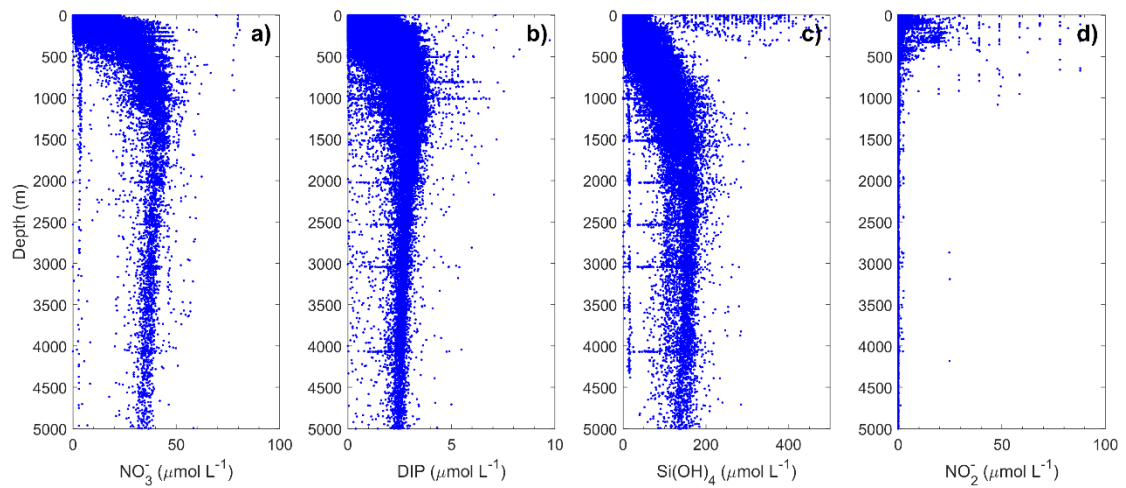

128

129

130

131

132

133

**Figure S22.** Profiles of nutrients collected from the Ocean Station Data in the World Ocean Database (before 1970) in the North Pacific basin: (a)  $\text{NO}_3^-$ ; (b) DIP; (c)  $\text{Si(OH)}_4$ ; (d)  $\text{NO}_2^-$ , illustrating the scattered vertical distribution.

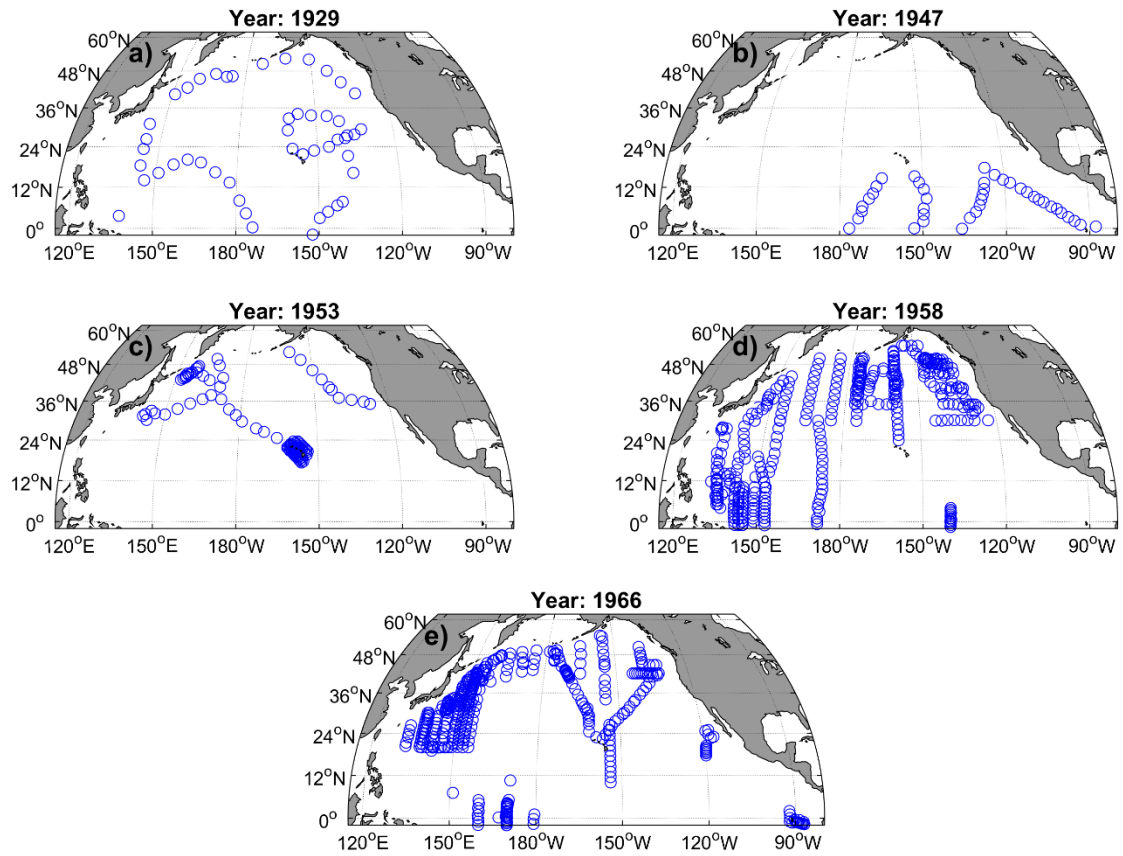

134

135 **Figure S23.** Hydrographic and nutrient sampling locations for selected years prior to  
 136 1970 (collected from Ocean Station Data in the World Ocean Database): (a) 1929, (b)  
 137 1947, (c) 1953, (d) 1958, and (e) 1966.

138

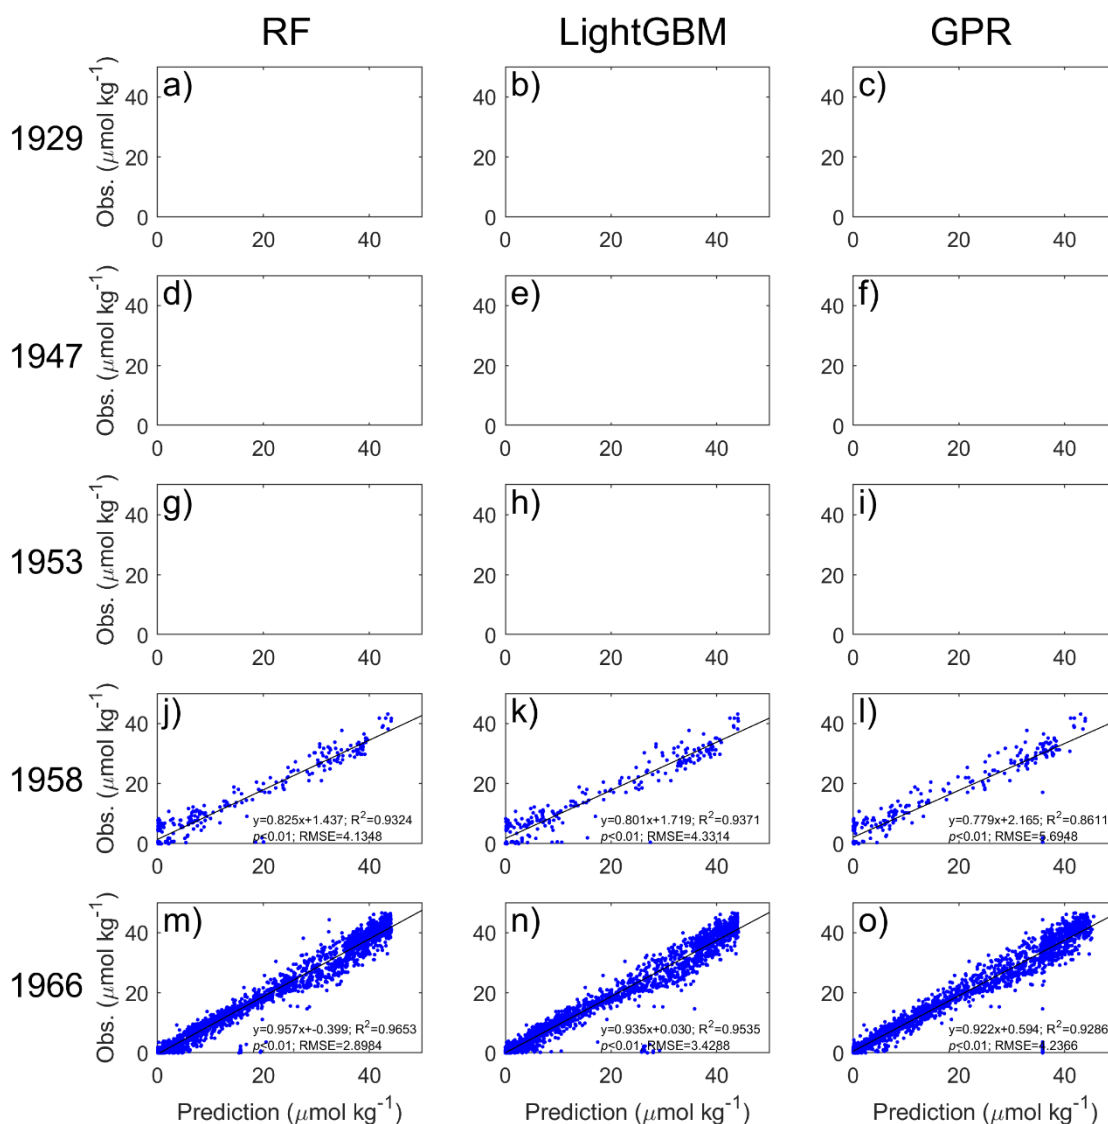

139

140 **Figure S24.** Validation of reconstructed  $\text{NO}_3^-$  concentrations from hydrography-based  
 141 reconstructions for 1929 (row 1), 1947 (row 2), 1953 (row 3), 1958 (row 4), and 1966  
 142 (row 5). Station locations are shown in Fig. S23. Columns correspond to different  
 143 reconstruction methods: Random Forest (RF; a, d, g, j, m), LightGBM (b, e, h, k, n),  
 144 and Gaussian Process Regression (GPR; c, f, i, l, o). Each panel displays the linear  
 145 regression fit (black line), regression equation, coefficient of determination ( $R^2$ ), p-  
 146 value, and root mean square error (RMSE). Note: no  $\text{NO}_3^-$  observations were available  
 147 for 1929, 1947, or 1953.

148

149

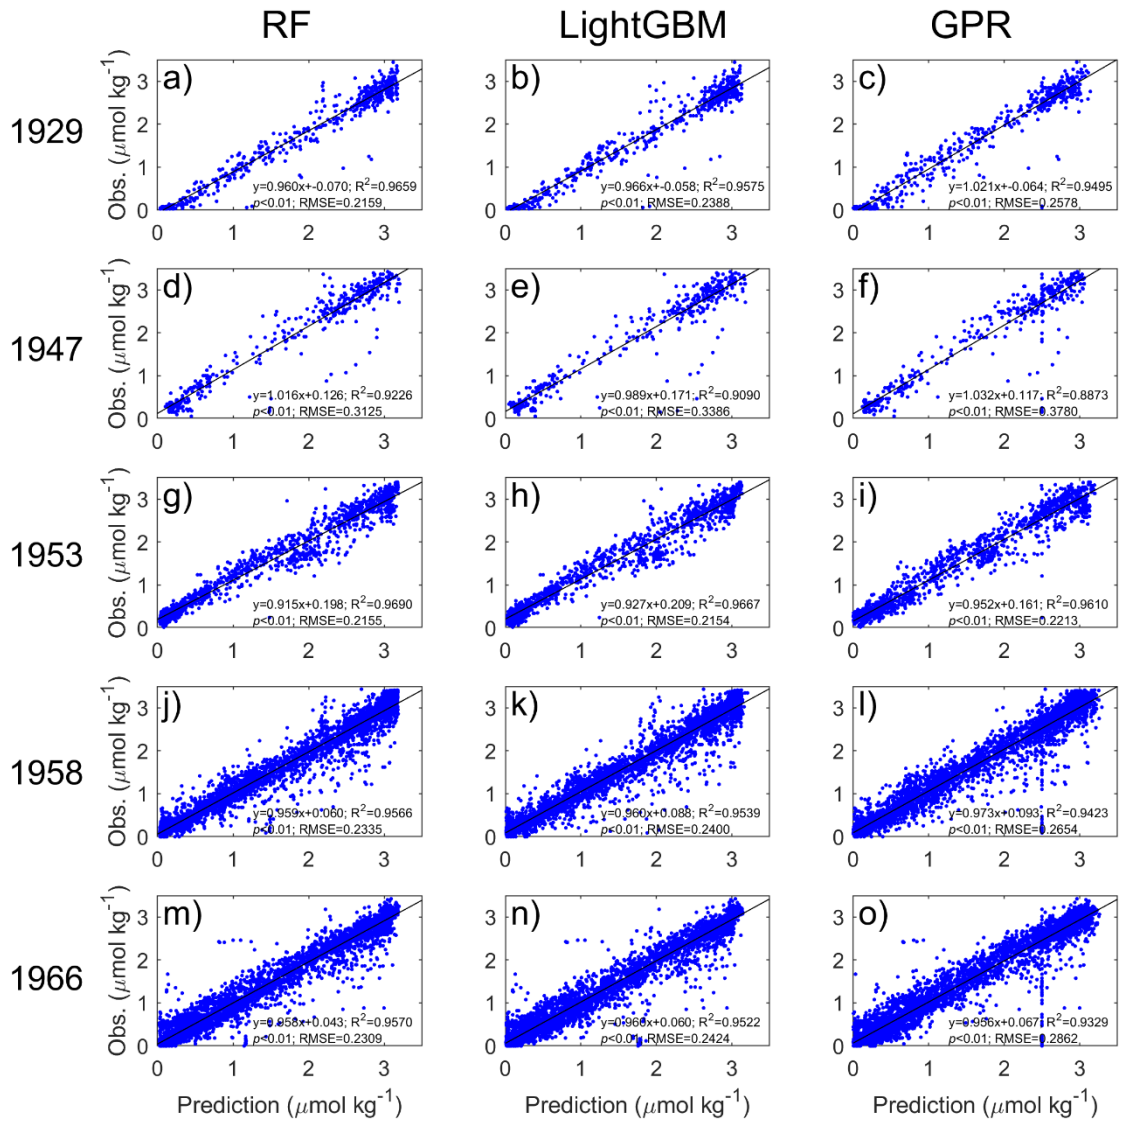

150

151 **Figure S25.** Same as Fig. S24, but for DIP.

152

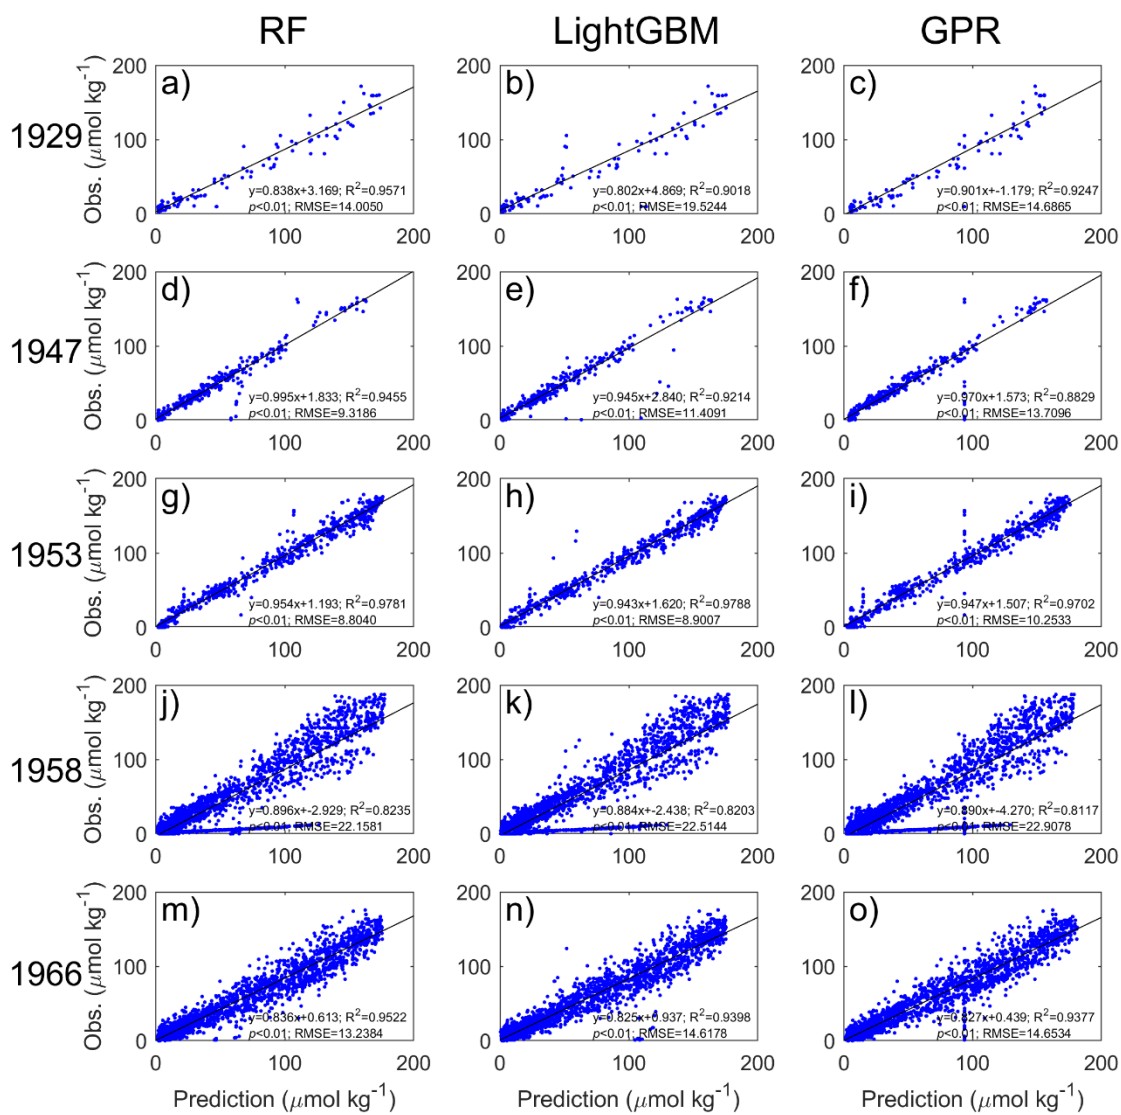

153

154 **Figure S26.** Same as Fig. S24, but for  $\text{Si(OH)}_4$ .

155

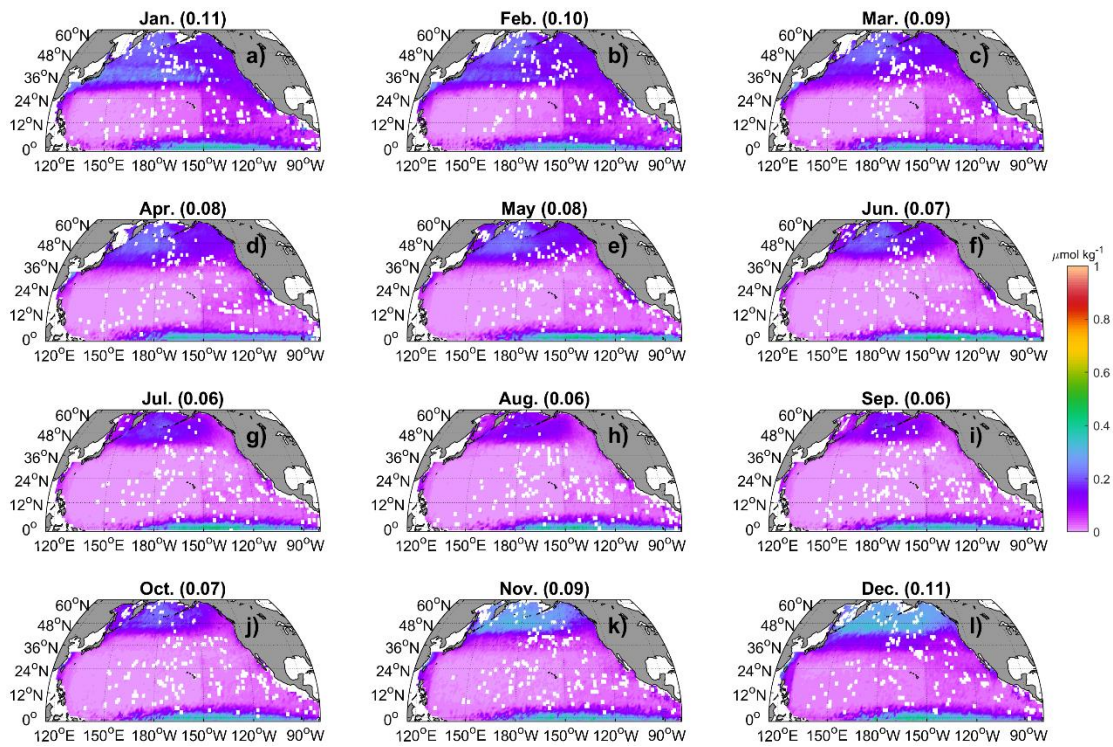

156

157 **Figure S27.** The monthly climatology of  $\text{NO}_2^-$  at 5 m in the North Pacific. Data are

158 binned and averaged within  $1 \times 1^\circ$  grid cell. The values in the title represent the spatial

159 mean values.

160

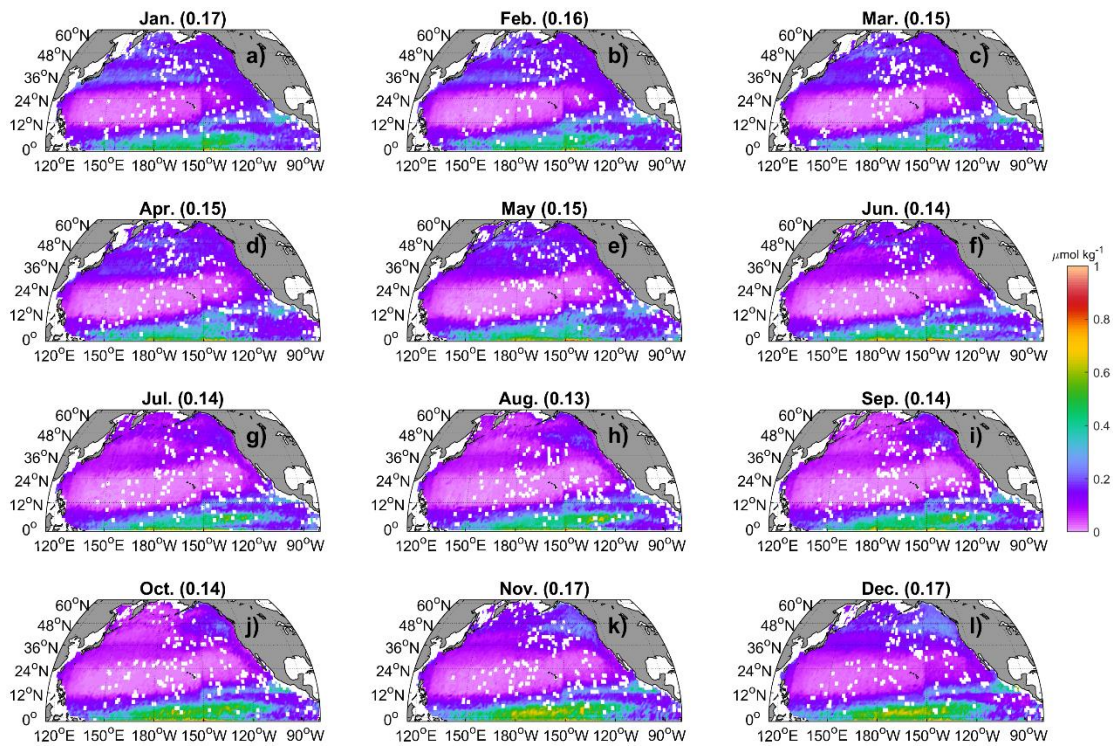

161

162 **Figure S28.** Similar to Fig. S27, but for a depth of 100 m.

163

164

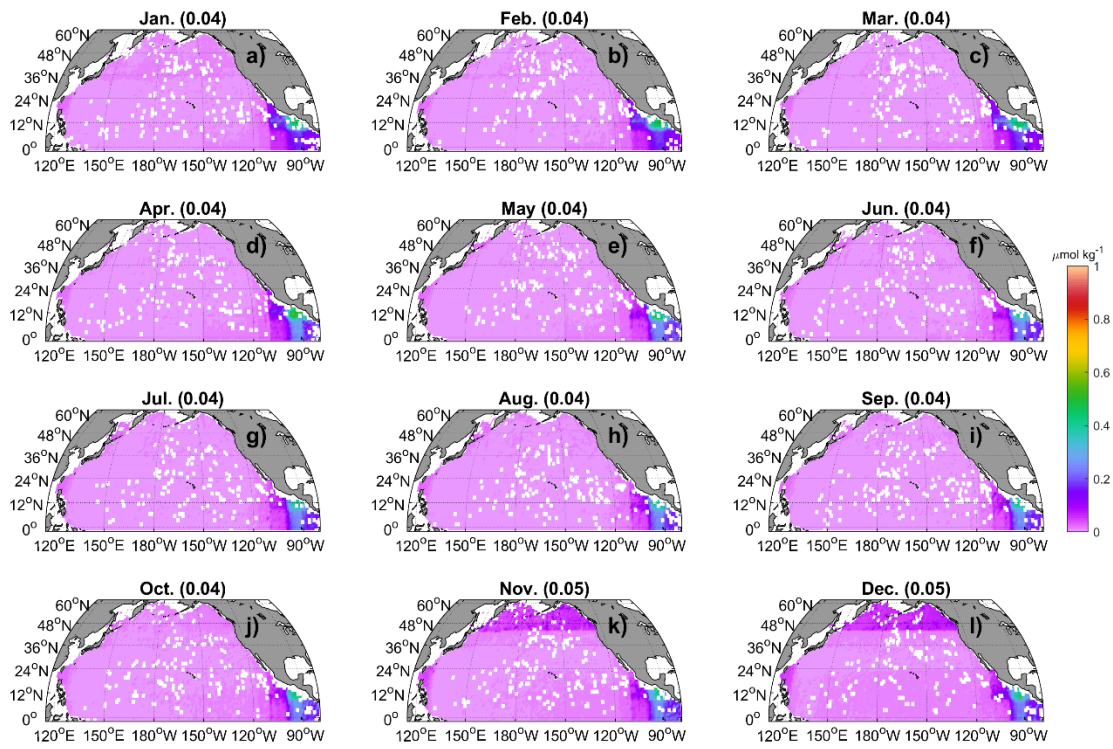

165

166 **Figure S29.** Similar to Fig. S27, but for a depth of 500 m.

167

168

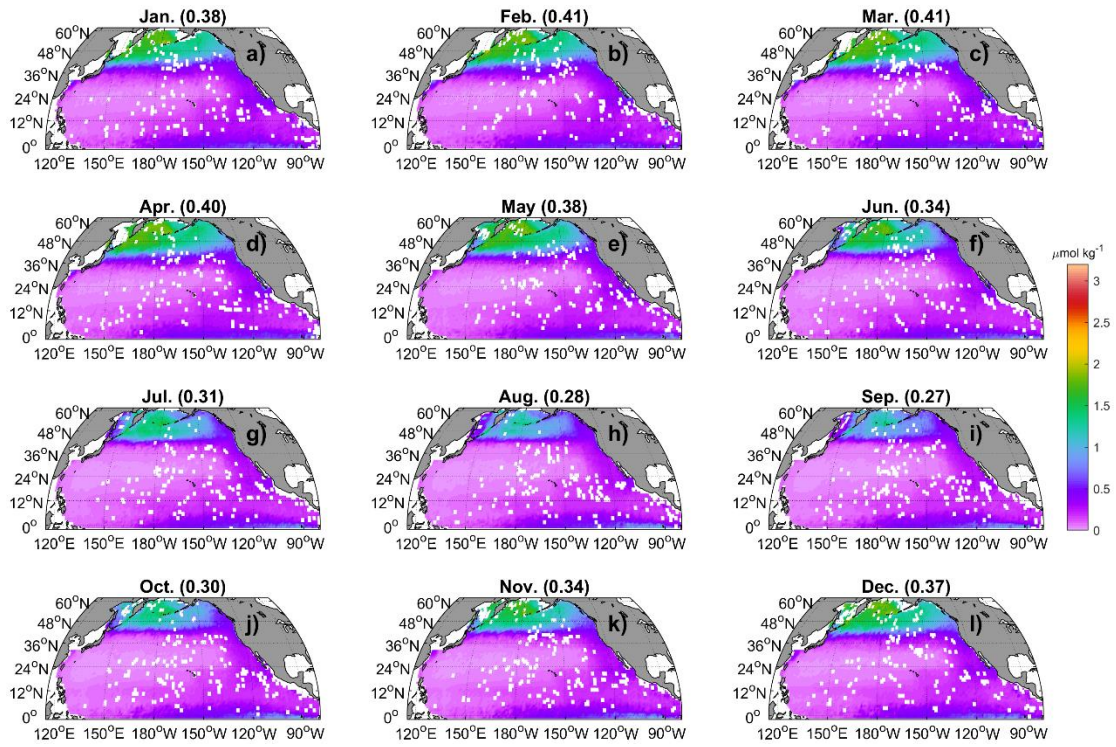

169

170

**Figure S30.** Similar to Fig. S27, but for DIP and at a depth of 5 m.

171

172

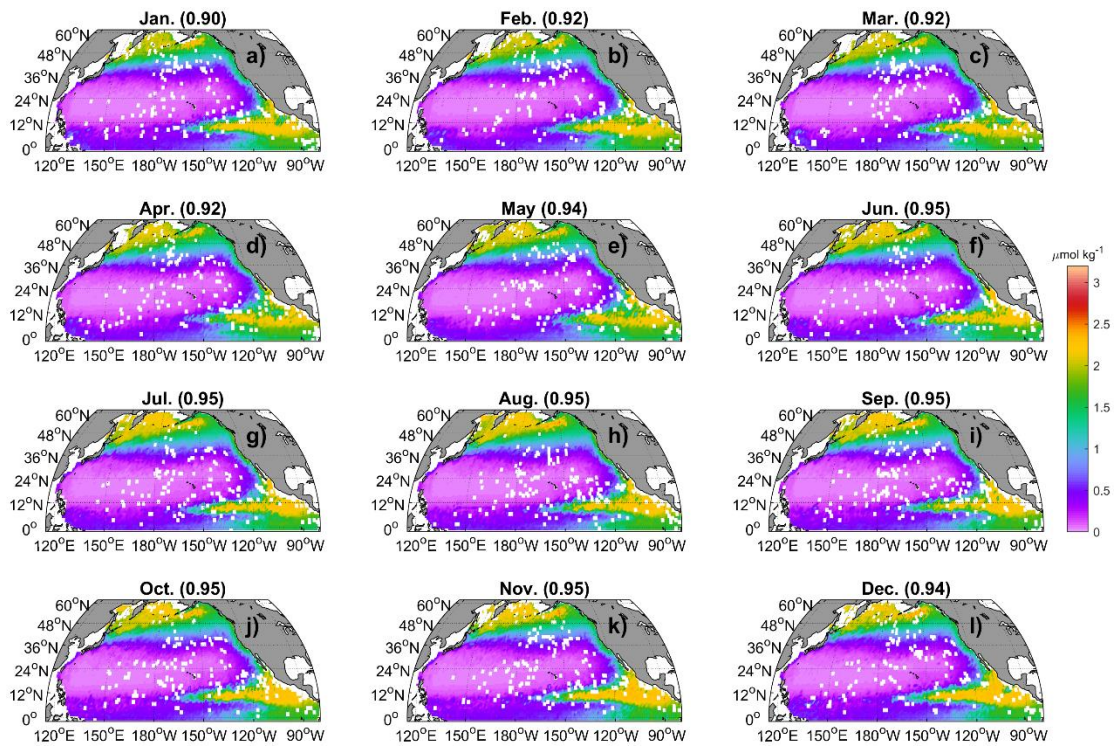

173

174 **Figure S31.** Similar to Fig. S27, but for DIP and at a depth of 100 m.

175

176

177

178

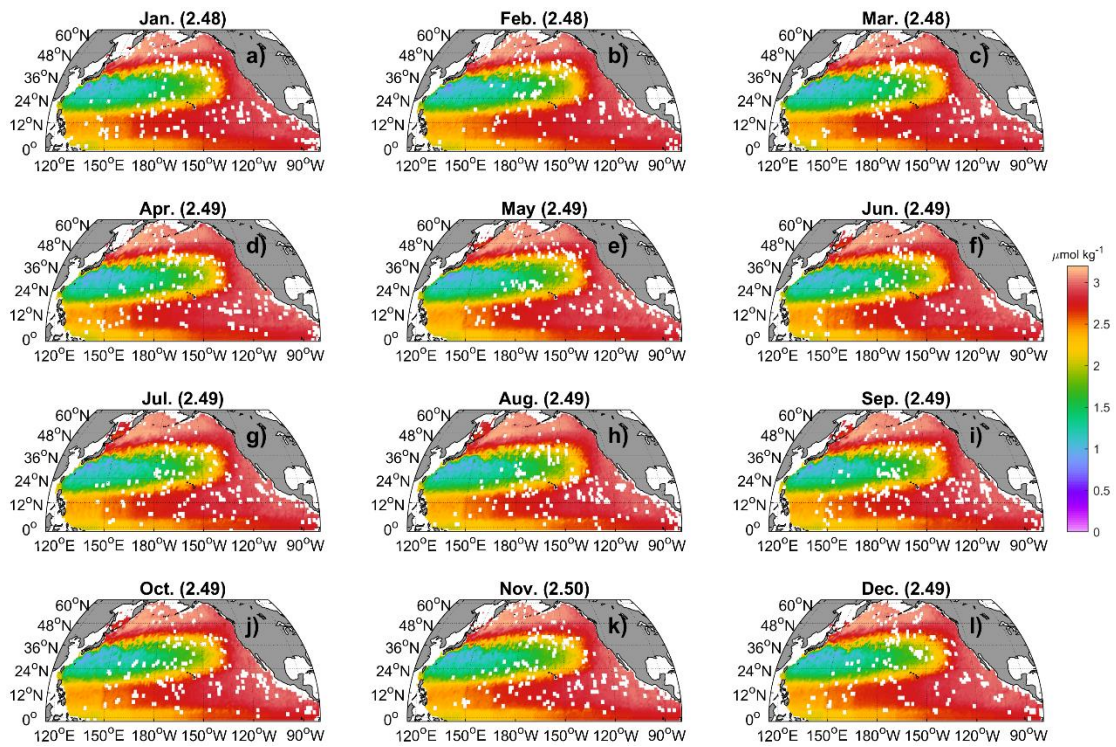

179

180 **Figure S32.** Similar to Fig. S27, but for DIP and at a depth of 500 m.

181

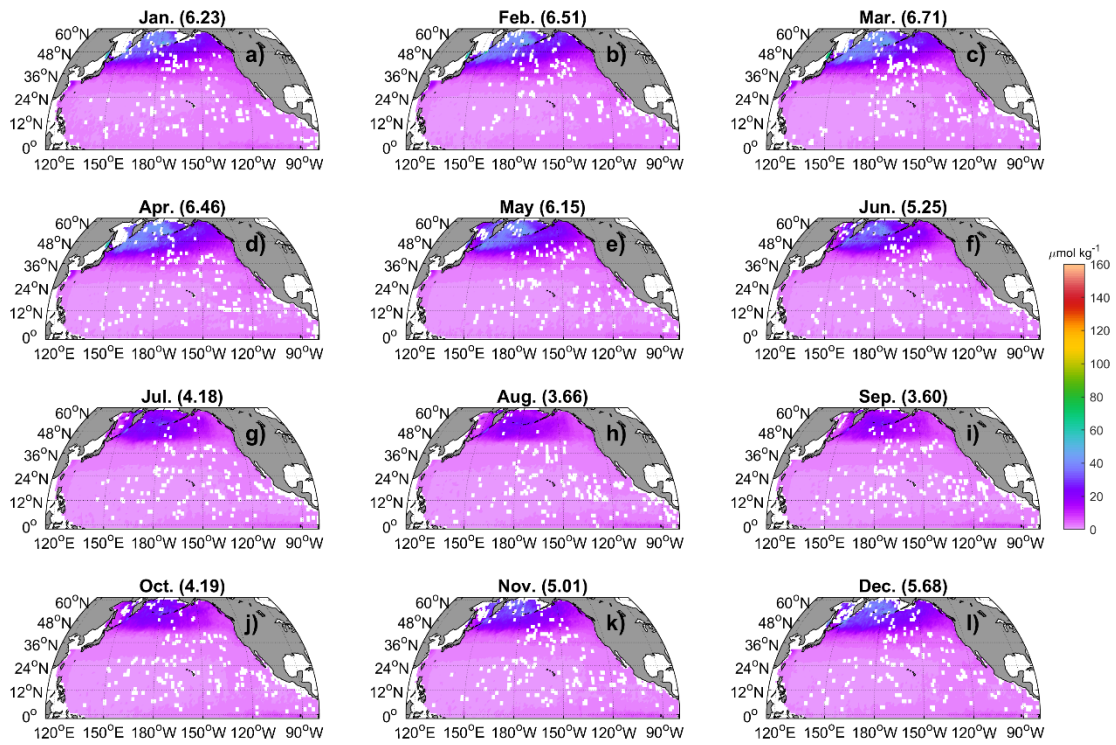

182

183 **Figure S33.** Similar to Fig. S27, but for  $\text{Si(OH)}_4$  and at a depth of 5 m.

184

185

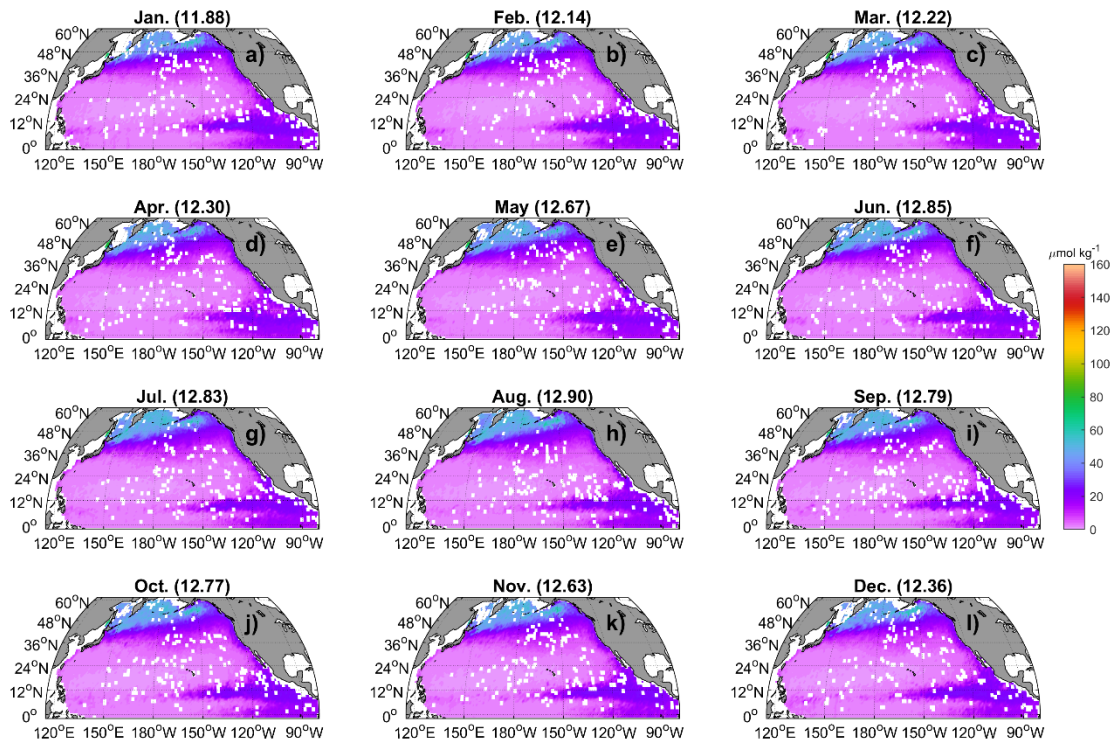

186

187 **Figure S34.** Similar to Fig. S27, but for  $\text{Si(OH)}_4$  and at a depth of 100 m.

188

189

190

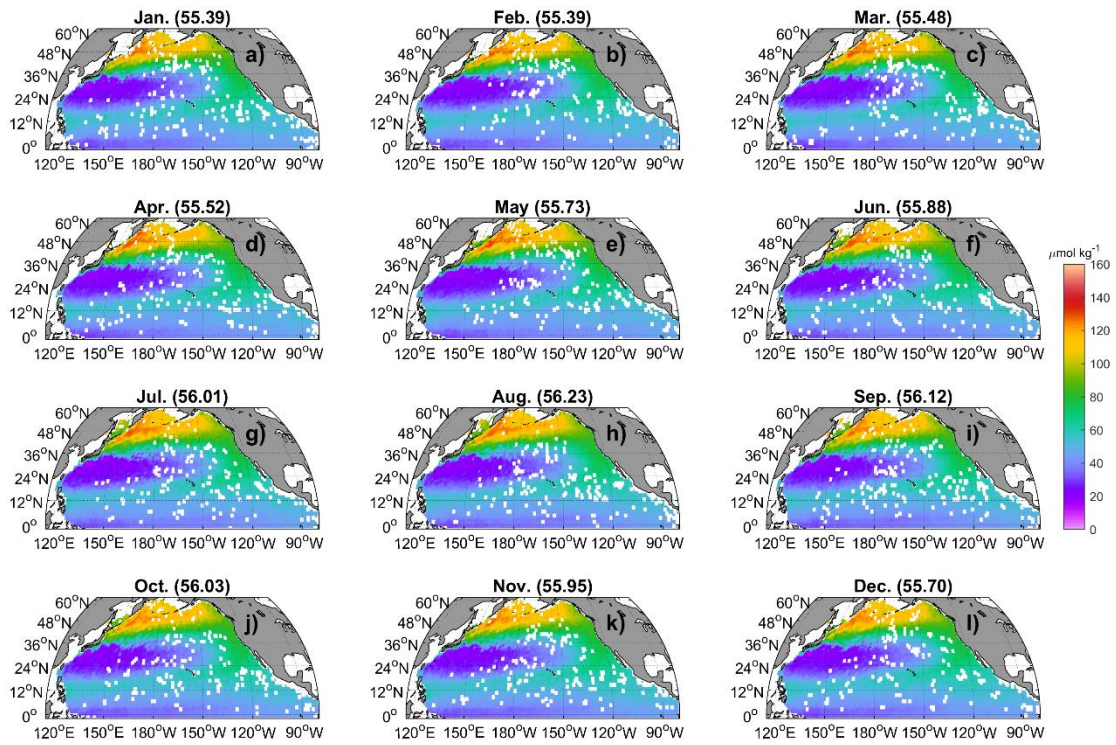

191

192 **Figure S35.** Similar to Fig. S27, but for  $\text{Si(OH)}_4$  and at a depth of 500 m.

193

194

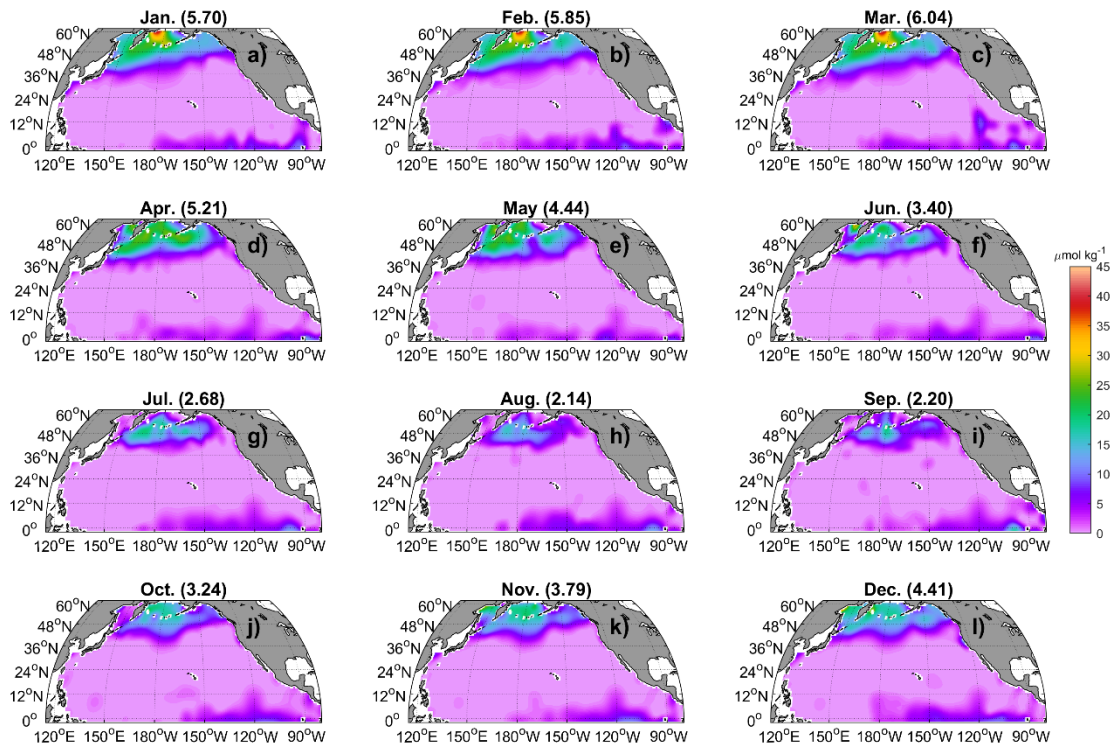

195

196 **Figure S36.** The WOA23 monthly climatology of  $\text{NO}_3^-$  at 5 m in the North Pacific.

197 The values in the title represent the spatial mean values.

198

199

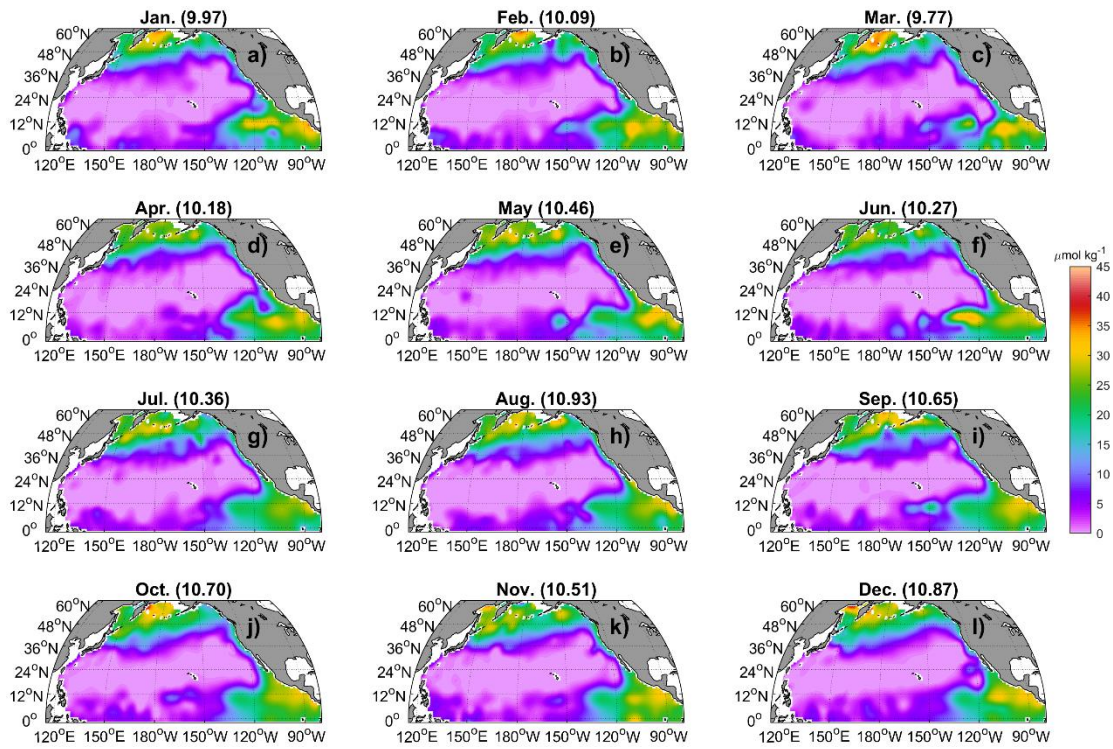

200

201 **Figure S37.** Similar to Fig. S36, but for a depth of 100 m.

202

203

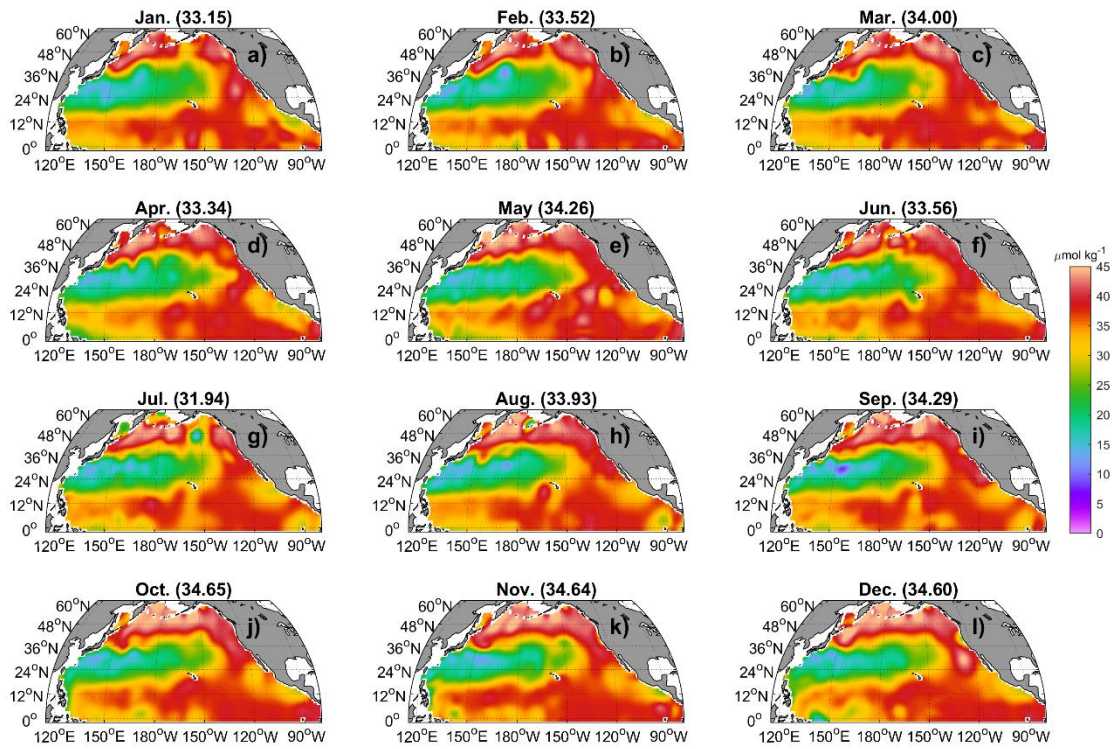

204

205 **Figure S38.** Similar to Fig. S36, but for a depth of 500 m.

206

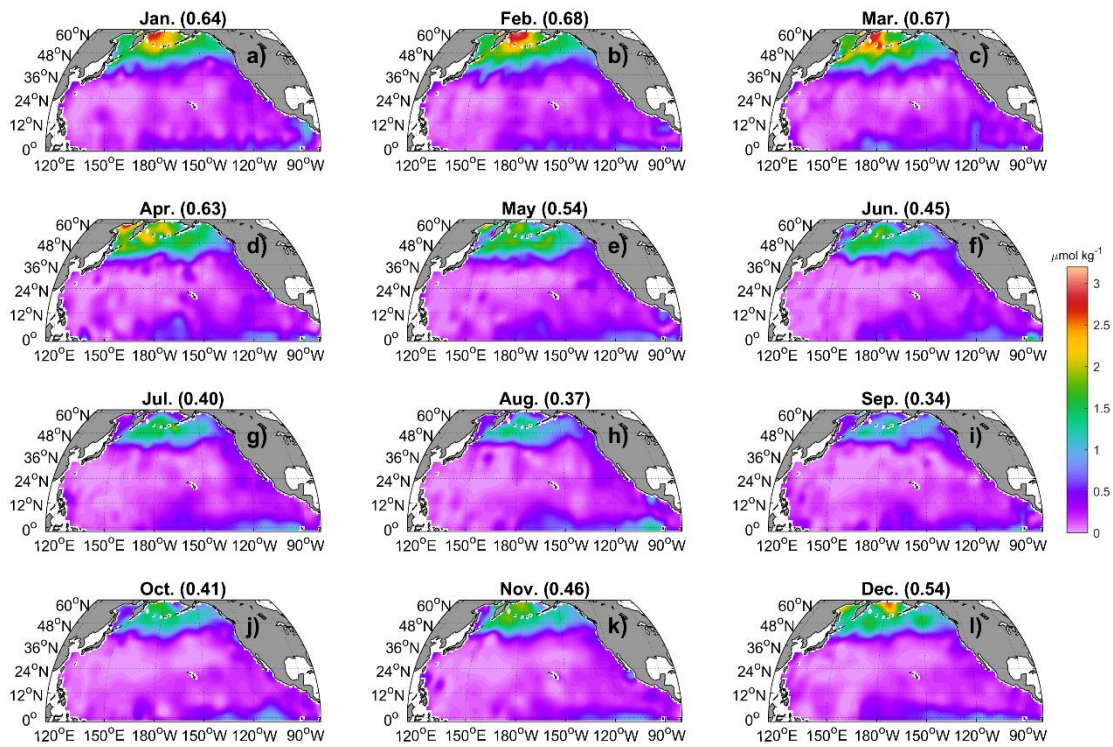

207

208 **Figure S39.** Similar to Fig. S36, but for DIP and at a depth of 5 m.

209

210

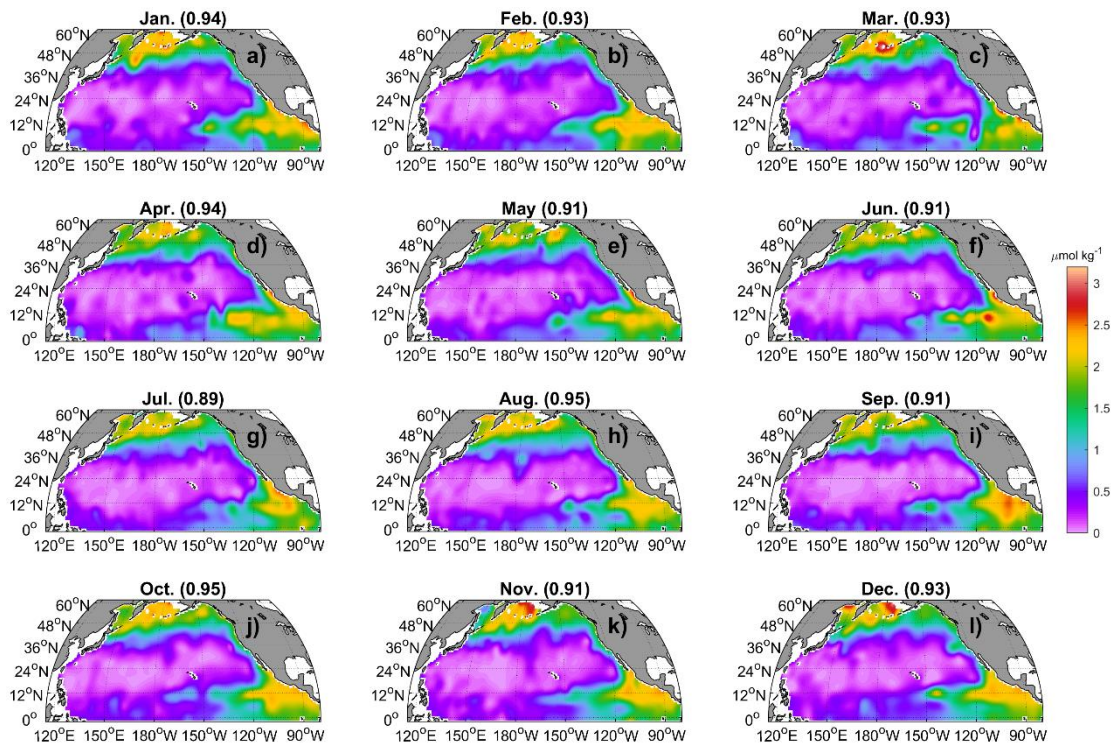

211

212 **Figure S40.** Similar to Fig. S36, but for DIP and at a depth of 100 m.

213

214

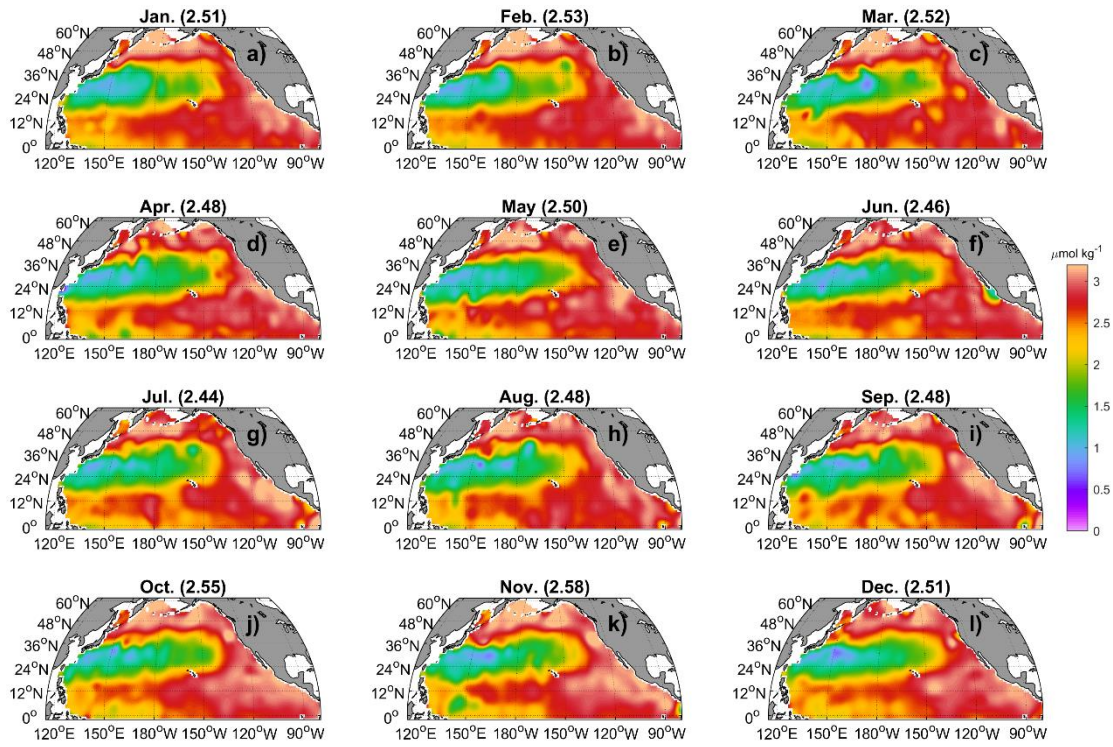

215

216 **Figure S41.** Similar to Fig. S36, but for DIP and at a depth of 500 m.

217

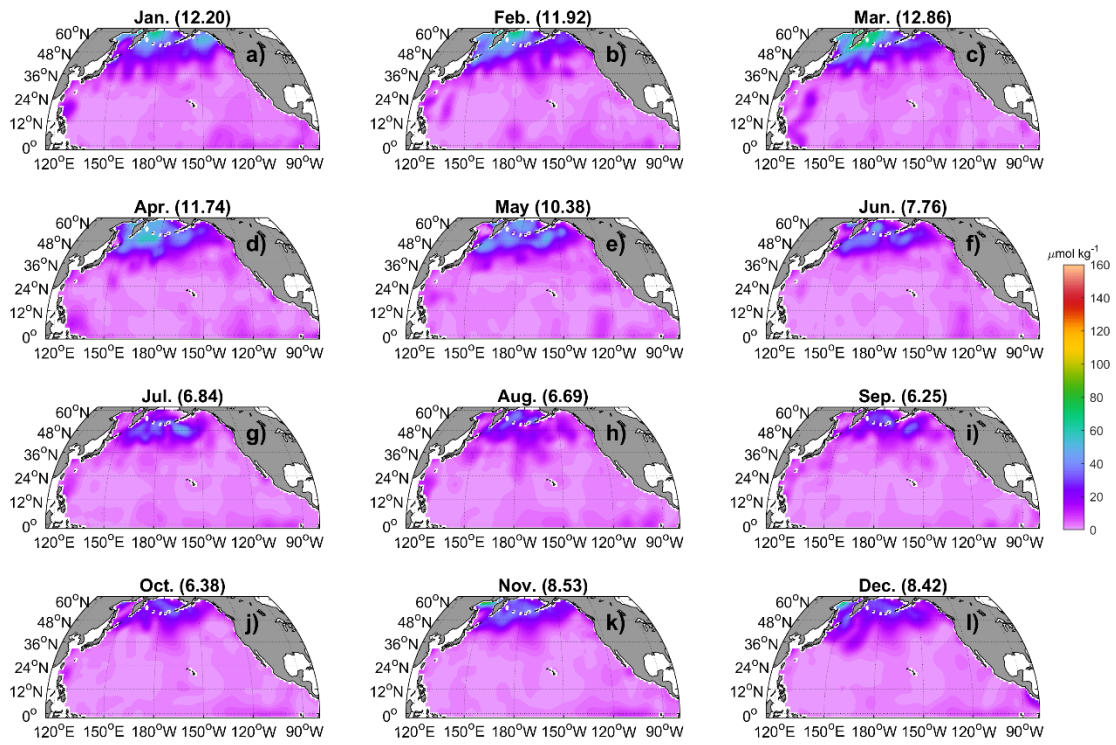

218

219 **Figure S42.** Similar to Fig. S36, but for  $\text{Si(OH)}_4$  and at a depth of 5 m.

220

221

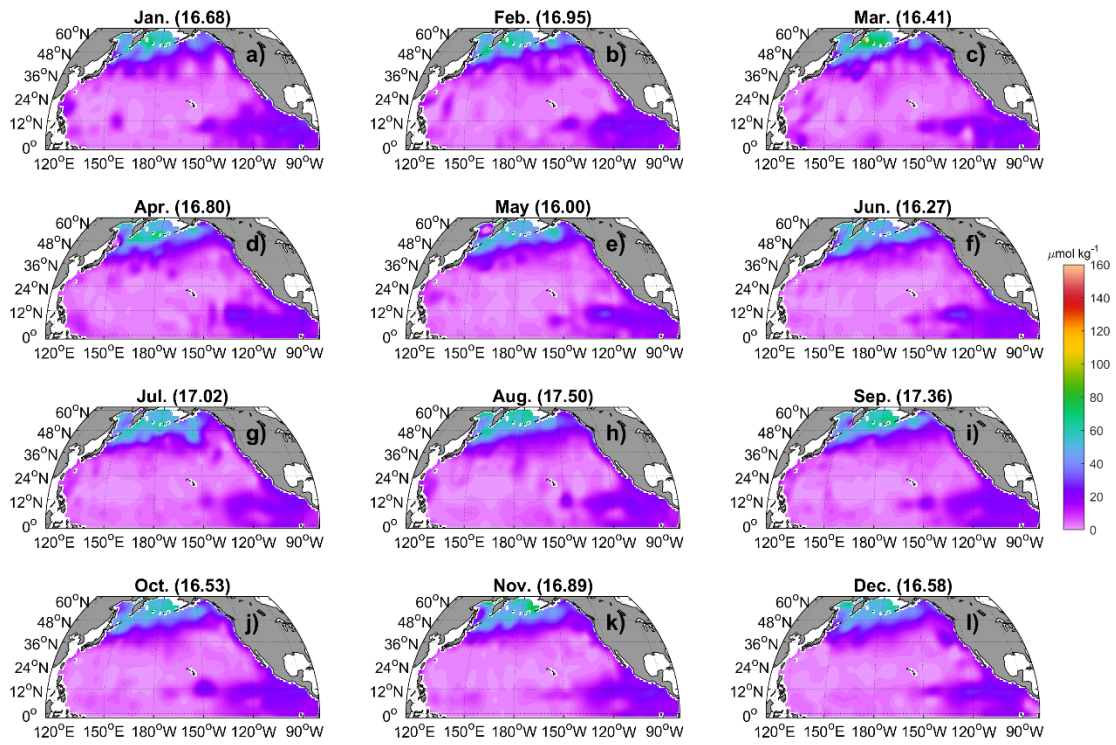

222

223 **Figure S43.** Similar to Fig. S36, but for  $\text{Si(OH)}_4$  and at a depth of 100 m.

224

225

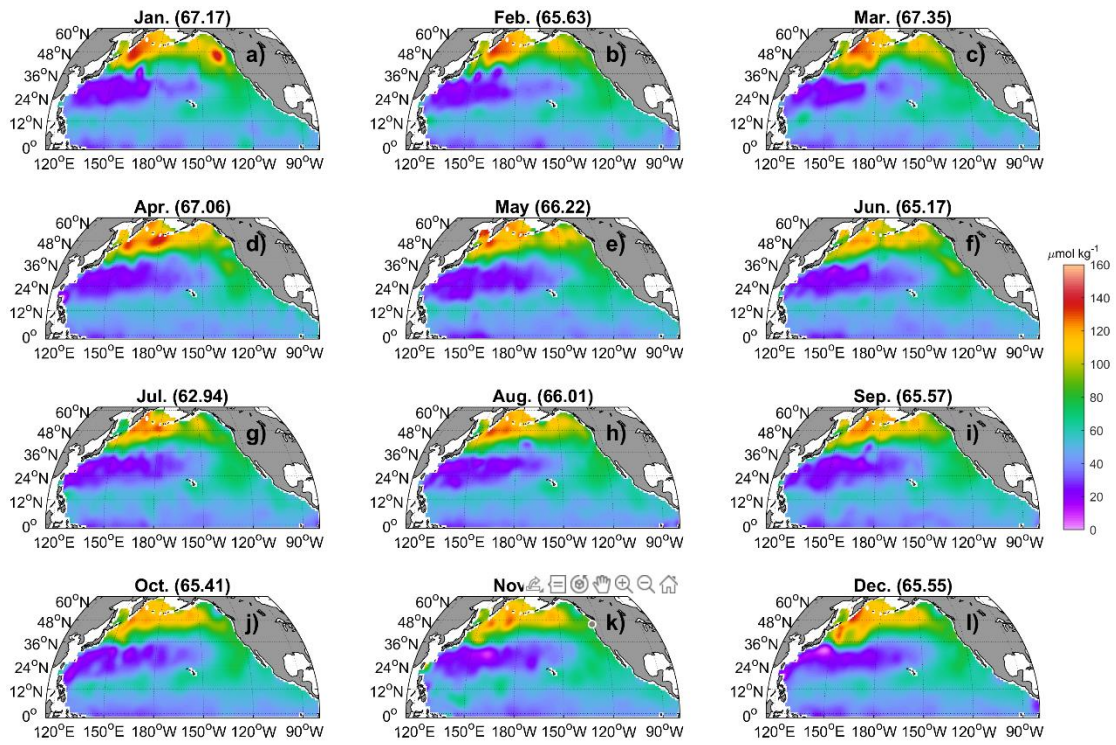

226

227 **Figure S44.** Similar to Fig. S36, but for  $\text{Si(OH)}_4$  and at a depth of 500 m.

228

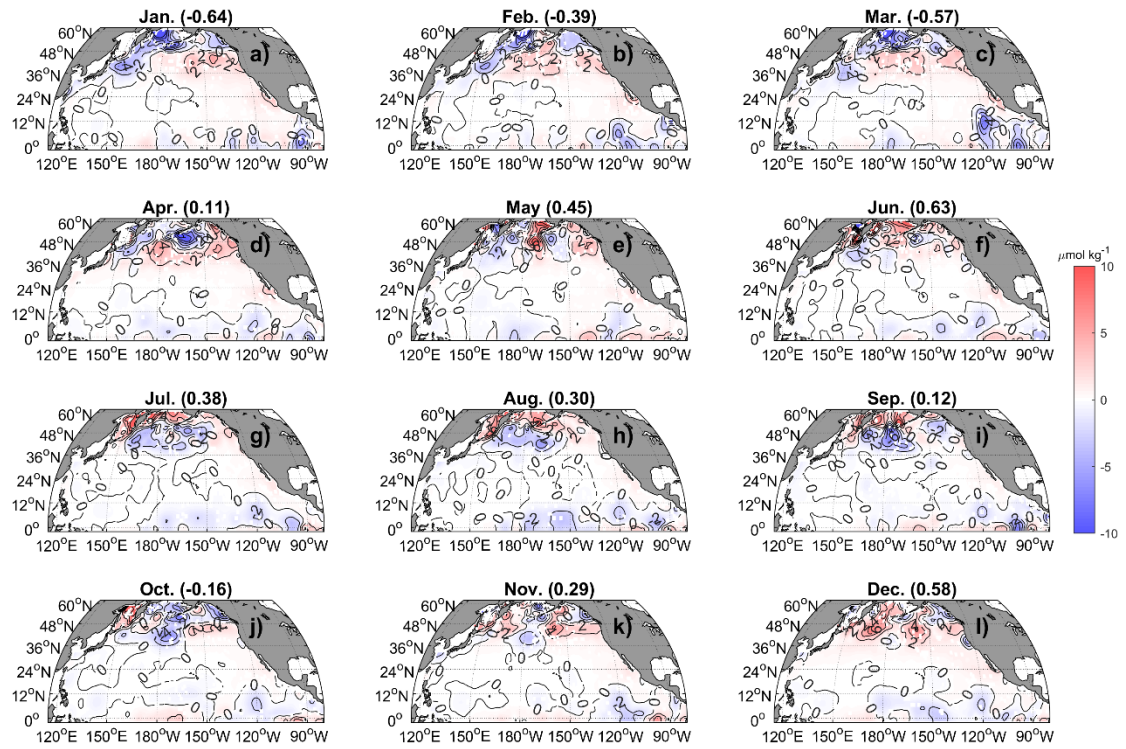

229

230 **Figure S45.** Difference between the predicted (Random Forest, RF) and World Ocean

231 Atlas (WOA) climatologies of  $\text{NO}_x^-$  ( $\text{NO}_3^- + \text{NO}_2^-$ ) at 5 m depth (RF minus WOA).

232

233

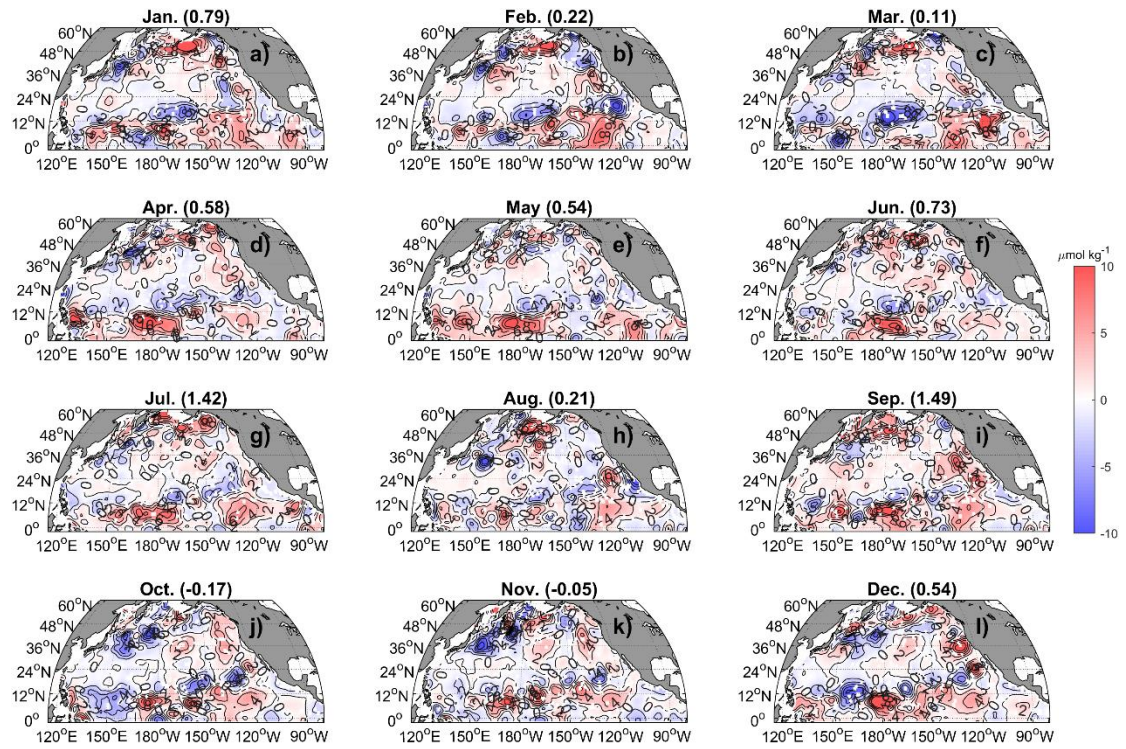

234  
 235  
 236  
 237  
 238

**Figure S46.** Same as Fig. S27, but for 100 m.

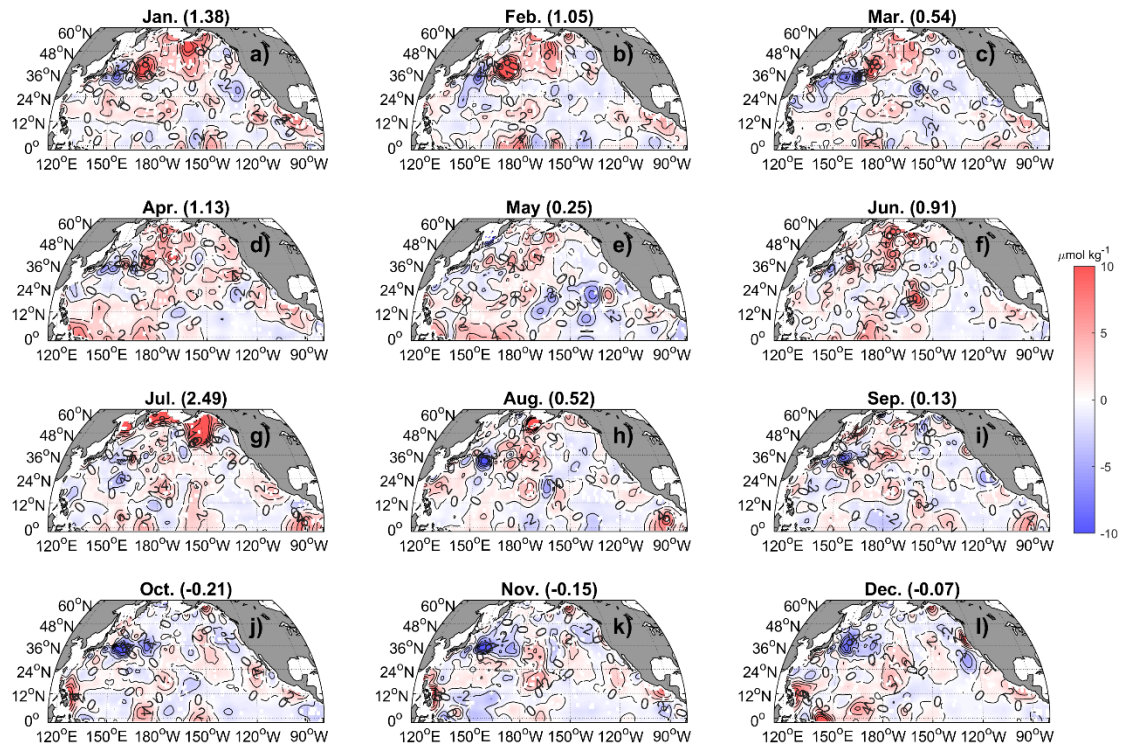

239

240

Figure S47. Same as Fig. S27, but for 500 m.

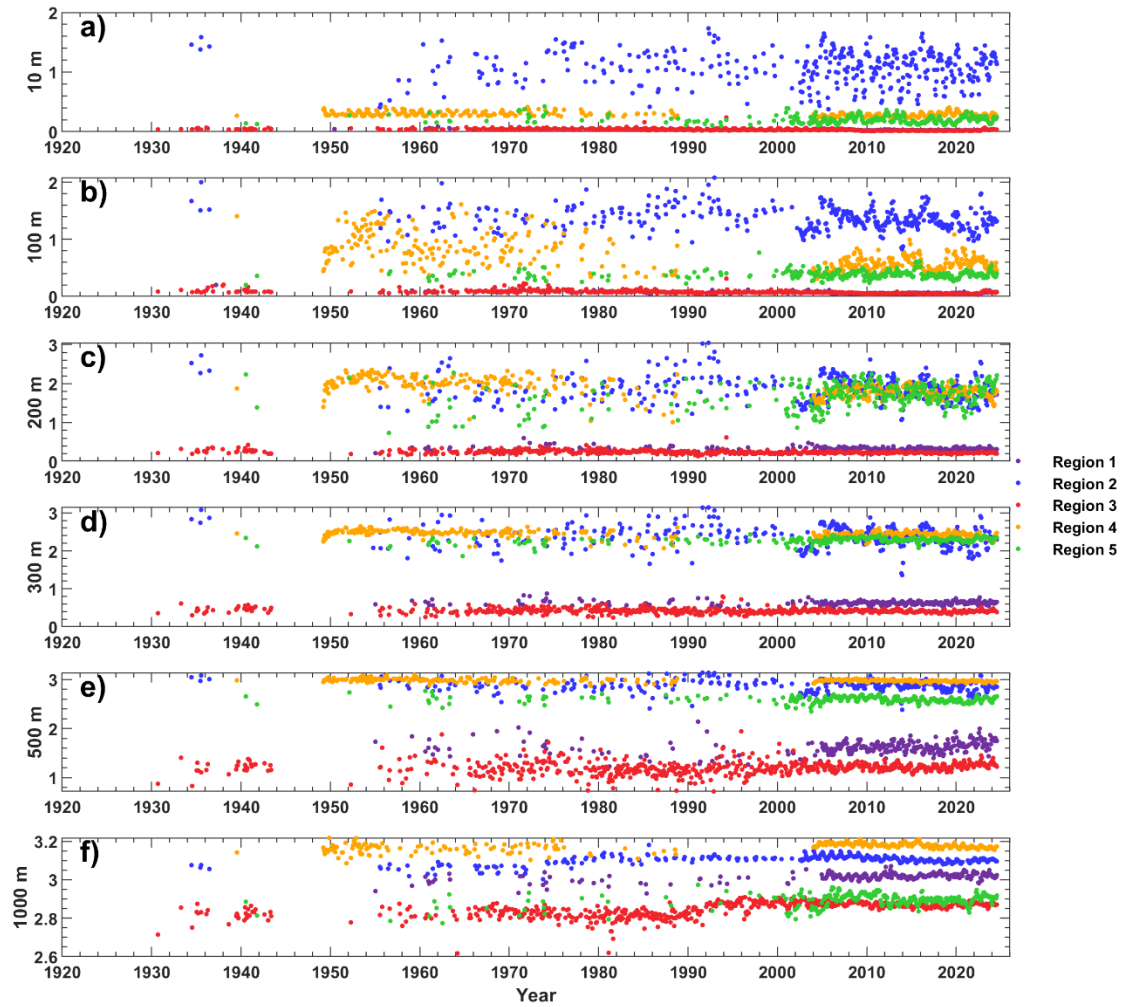

241

242 **Figure S48.** Time series of reconstructed DIP concentrations at 10 m (a), 100 m (b),  
 243 200 m (c), 300 m (d), 500 m (e), and 1000 m (f) for regions 1 - 5 (see Fig. 16). Data  
 244 were first binned by depth and region, then averaged by month.

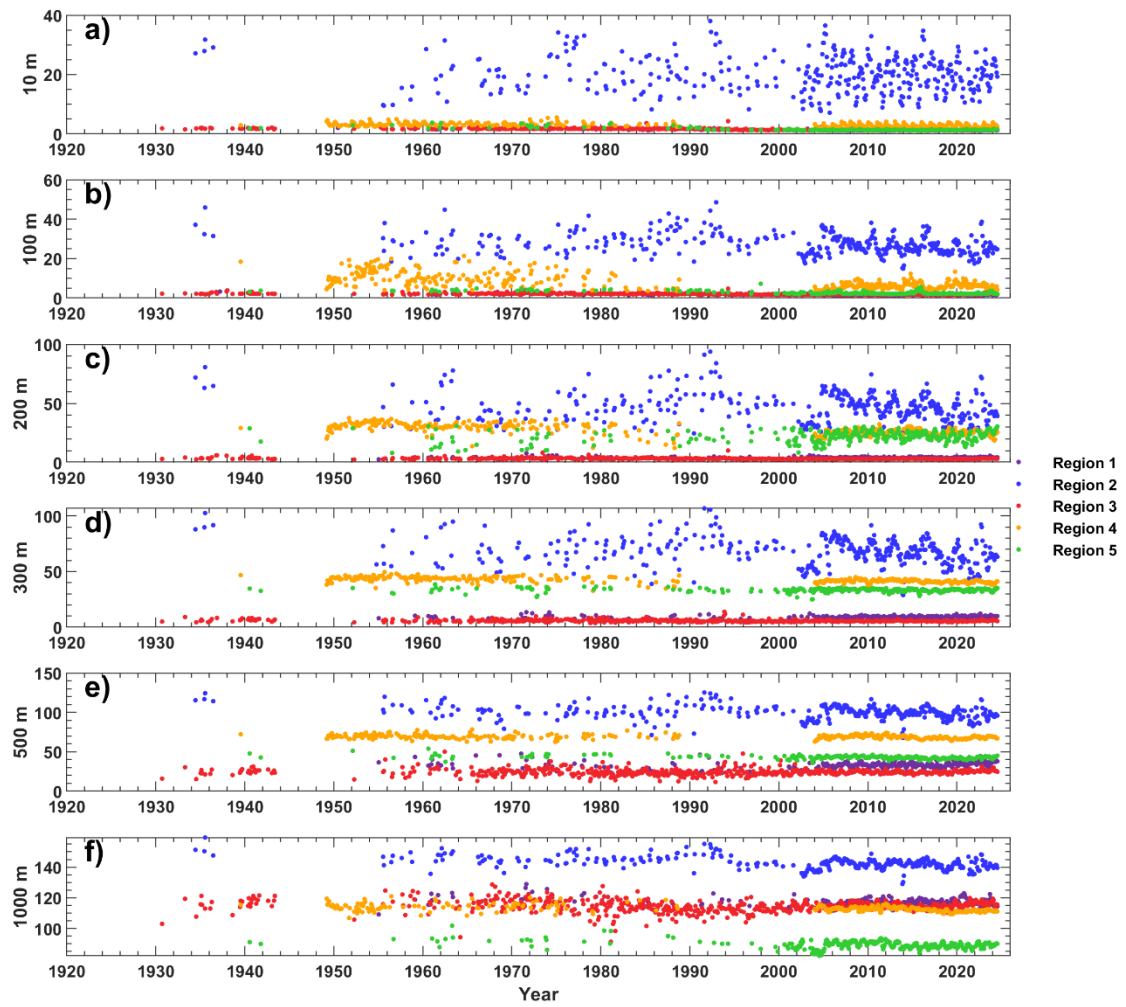

245

246 **Figure S49.** Same as Figure S48, but for  $\text{Si(OH)}_4$ .

247

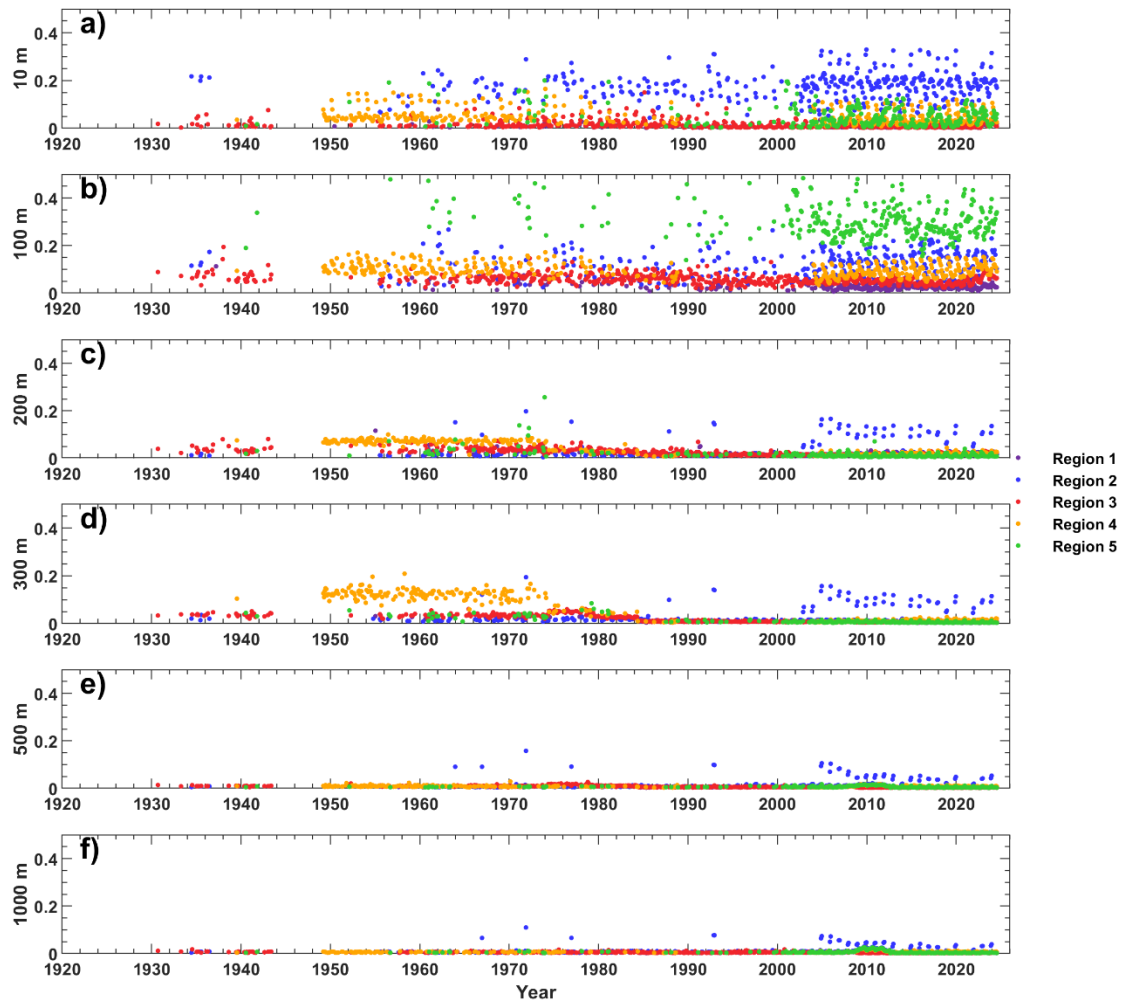

248

249 **Figure S50.** Same as Figure S48, but for  $\text{NO}_2^-$ .

250

251
